# Supplementary material for: Design and recognition of cucurbituril-secured platinum-bound oligopeptides
Source: Royal Society of Chemistry journal article supplement (doi:10.1039/d1sc02637b), 2021-01-01
Supplement: d1sc02637b1.pdf [file d1sc02637b1.pdf]

## Design and Recognition of Cucurbituril-secured Platinum-bound Oligopeptides

Héctor Barbero and Eric Masson\*

Department of Chemistry and Biochemistry, Ohio University, Athens, Ohio 45701, United States

e-mail: [masson@ohio.edu](mailto:masson@ohio.edu)

### Supporting Information

|                                                                                                                                                                       |    |
|-----------------------------------------------------------------------------------------------------------------------------------------------------------------------|----|
| 1. Generalities.....                                                                                                                                                  | 2  |
| 2. Preparation and characterization of CB[n]-bound Pt(tpy) chloride complexes.....                                                                                    | 2  |
| 3. Preparation and characterization of Pt/peptide/CB[n] assemblies.....                                                                                               | 3  |
| 4. <sup>1</sup> H and <sup>13</sup> C NMR spectra of the Pt/peptide/CB[n] assemblies.....                                                                             | 6  |
| 5. DOSY analysis for assemblies CB[8] <sup>Pt</sup> · <b>1</b> <sub>2</sub> and CB[8] <sup>Pt</sup> · <b>1</b> <sub>2</sub> ·CB[8] <sup>Phe</sup> <sub>HT</sub> ..... | 16 |
| 6. Mass spectrometry analysis of Pt/peptide/CB[n] assemblies.....                                                                                                     | 19 |
| 7. UV-Vis absorption spectra of the Pt/peptide/CB[n] assemblies.....                                                                                                  | 22 |
| 8. Titration of peptide FGGGC with CB[8].....                                                                                                                         | 22 |
| 9. Isothermal Titration Calorimetry (ITC) experiments.....                                                                                                            | 23 |
| 10. Computational details.....                                                                                                                                        | 25 |
| 11. Coordinates of the most stable structure of pendant necklace CB[8] <sup>Pt</sup> · <b>1</b> <sub>2</sub> ·CB[8] <sup>Phe</sup> <sub>HT</sub> .....                | 26 |
| 12. References.....                                                                                                                                                   | 28 |

## 1. Generalities

All reagents were purchased from chemical suppliers and used without further purification. Peptide FGGGC (98% purity) was purchased from KareBay Biochem, Inc., Monmouth Junction, NJ. Cucurbit[7]uril (CB[7]) and Cucurbit[8]uril (CB[8]) were prepared using known procedures.<sup>1</sup> Solvents were of analytical grade and either used as purchased or dried according to procedures described elsewhere.<sup>2</sup> Characterization by Nuclear Magnetic Resonance spectroscopy (NMR) was carried out using a Bruker Ascend 500 MHz spectrometer and a Bruker Avance III HD Ascend 700 MHz located in the Campus Chemical Instrument Center (CCIC) NMR facility at The Ohio State University (OSU). <sup>1</sup>H and <sup>13</sup>C NMR chemical shifts are reported in parts per million (ppm) and are referenced to TMS using the residual signal of the solvent as an internal reference. Coupling constants (*J*) are reported in hertz (Hz). Standard abbreviations used to indicate multiplicity are: s = singlet, d = doublet, t = triplet, q = quartet, m = multiplet. Ultrahigh resolution/accurate mass measurements were carried out on a Bruker SolarixR 15T Fourier transform ion cyclotron resonance (FT-ICR) instrument. Positively charged ions were generated by electrospray ionization (ESI) and matrix assisted laser desorption/ionization (MALDI;  $\alpha$ -cyano hydroxycinnamic acid was used as matrix). ESI produced multiply charged ions that were used to confirm product identity. ESI solutions (approx. 5  $\mu$ M) in acetonitrile/water 1:1 were sprayed by direct infusion. The resolution of the FT-ICR instrument was set to 300,000 (at *m/z* 400). For MALDI, a Yag-Nd laser was used (351 nm; 15% of total power). UV-Vis absorption spectra were recorded on an Agilent HP-8453 diode-array spectrophotometer. Wavelengths ( $\lambda$ ) are reported in nanometers (nm) and molar absorption coefficients ( $\epsilon$ ) are reported in  $M^{-1} \cdot cm^{-1}$ . Computational work was carried out on the Owens cluster of the Ohio Supercomputer Center in Columbus, OH (23,392-core Dell Intel Xeon E5-2680 v4 machines). 4'-(3,5-Difluorophenyl)-2,2':6',2''-terpyridine and chloro[4'-(3,5-difluorophenyl)-2,2':6',2''-terpyridine]platinum(II) chloride (Pt·Cl) were prepared according to published procedures.<sup>3</sup>

## 2. Preparation and characterization of CB[n]-bound Pt(tpy) chloride complexes

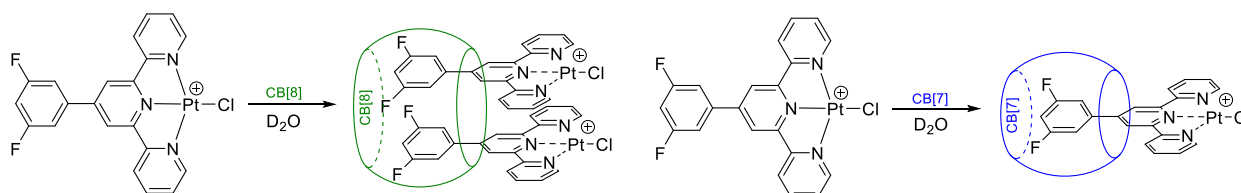

Chloro[4'-(3,5-difluorophenyl)-2,2':6',2''-terpyridine]platinum(II) chloride (3.1 mg, 5.1  $\mu$ mol) was mixed with  $D_2O$  (5.0 mL). CB[8] (3.3 mg, 2.5  $\mu$ mol) or CB[7] (5.9 mg, 5.1  $\mu$ mol) was added subsequently, and the resulting mixture was sonicated thoroughly. The stock solution was stored at 4  $^{\circ}C$  for further use.

CB[8]<sup>Pt</sup>·(Pt·Cl)<sub>2</sub>. <sup>1</sup>H NMR (500 MHz,  $D_2O$ )  $\delta$  8.81 (dd, *J* = 5.7, 1.5 Hz, 4H, H<sup>6</sup>), 8.60 (d, *J* = 8.0 Hz, 4H, H<sup>3</sup>), 8.19 (td, *J* = 7.8, 1.5 Hz, 4H, H<sup>4</sup>), 8.16 (s, 4H, H<sup>3'</sup>), 7.59 (ddd, *J* = 7.4, 5.6, 1.3 Hz, 4H, H<sup>5</sup>), 6.64 – 6.52 (m, 6H, H<sup>7</sup>+H<sup>8</sup>), 5.78 (d, *J* = 15.3 Hz, 8H, H<sup>CB[8]</sup>), 5.66 (d, *J* = 15.3 Hz, 8H, H<sup>CB[8]</sup>), 5.40 (s, 16H, H<sup>CB[8]</sup>), 4.11 (d, *J* = 10.5 Hz, 8H, H<sup>CB[8]</sup>), 4.08 (d, *J* = 10.5 Hz, 8H, H<sup>CB[8]</sup>). <sup>19</sup>F NMR (471 MHz,  $D_2O$ )  $\delta$  -106.84.

CB[7]<sup>Pt</sup>·(Pt·Cl). <sup>1</sup>H NMR (500 MHz,  $D_2O$ )  $\delta$  9.11 (d, *J* = 8.2 Hz, 4H, H<sup>6</sup>), 8.90 (d, *J* = 5.8 Hz, 4H, H<sup>3</sup>), 8.59 (s, 4H, H<sup>4</sup>), 8.36 (t, *J* = 7.9 Hz, 4H, H<sup>3'</sup>), 7.76 (t, *J* = 6.7 Hz, 4H, H<sup>5</sup>), 6.76 (d, *J* = 7.3 Hz, 4H, H<sup>7</sup>), 6.53 (t, *J* = 8.8 Hz, 2H, H<sup>8</sup>), 5.73 (d, *J* = 15.4 Hz, 8H, H<sup>CB[7]</sup>), 5.63 (d, *J* = 15.3 Hz, 8H, H<sup>CB[7]</sup>), 5.39 (s, 16H, H<sup>CB[7]</sup>), 4.10 (t, *J* = 15.8 Hz, 16H, H<sup>CB[7]</sup>).

### 3. Preparation and characterization of Pt/peptide/CB[n] assemblies

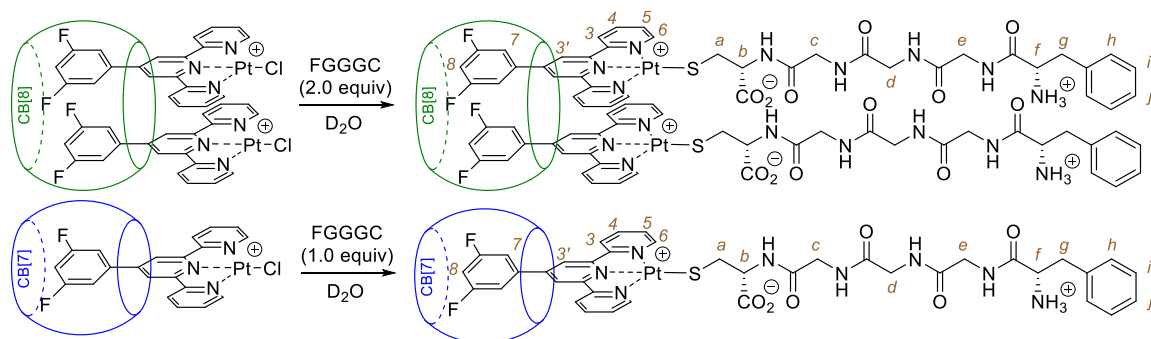

In an NMR tube, stock solutions of complexes  $\text{CB}[8]^{\text{Pt}} \cdot (\text{Pt} \cdot \text{Cl})_2$  or  $\text{CB}[7]^{\text{Pt}} \cdot (\text{Pt} \cdot \text{Cl})$  (1.0 mM, 0.60  $\mu\text{mol}$ , 0.60 mL) were treated with an aqueous solution of peptide FGCGC (50 mM, 0.60  $\mu\text{mol}$ , 12  $\mu\text{L}$ ) and the mixture was subsequently stirred and kept at 40  $^{\circ}\text{C}$  for 1 h. The color of the sample turned from yellow to red.

Assemblies  $\text{CB}[8]^{\text{Pt}} \cdot (\mathbf{1} \cdot \text{CB}[7]^{\text{Phe}})_2$ ,  $\text{CB}[8]^{\text{Pt}} \cdot \mathbf{1}_2 \cdot \text{CB}[8]^{\text{Phe}}_{\text{HT}}$  and  $\text{CB}[7]^{\text{Pt}} \cdot \mathbf{1} \cdot \text{CB}[7]^{\text{Phe}}$  were obtained by adding  $\text{CB}[7]$  or  $\text{CB}[8]$  in relevant amounts, and the mixtures were sonicated for 10 min.

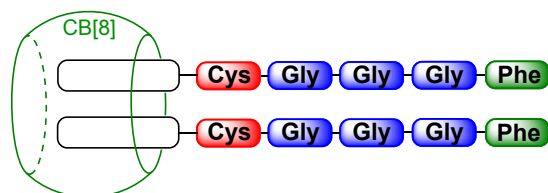

$\text{CB}[8]^{\text{Pt}} \cdot \mathbf{1}_2$ .  $^1\text{H}$  NMR (500 MHz,  $\text{D}_2\text{O}$ )  $\delta$  9.15 (dd,  $J = 10.6, 5.8$  Hz, 4H,  $\text{H}^6$ ), 8.58 (t,  $J = 8.0$  Hz, 4H,  $\text{H}^3$ ), 8.24 – 8.10 (m, 8H,  $\text{H}^4 + \text{H}^3$ ), 7.58 (dt,  $J = 27.7, 6.6$  Hz, 4H,  $\text{H}^5$ ), 7.42 – 7.27 (m, 6H,  $\text{H}^1 + \text{H}^1$ ), 7.24 (d,  $J = 7.1$  Hz, 4H,  $\text{H}^h$ ), 6.67 – 6.47 (m, 6H,  $\text{H}^7 + \text{H}^8$ ), 5.77 (d,  $J = 15.3$  Hz, 8H,  $\text{H}^{\text{CB}[8]}$ ), 5.64 (d,  $J = 15.3$  Hz, 8H,  $\text{H}^{\text{CB}[8]}$ ), 5.38 (s, 16H,  $\text{H}^{\text{CB}[8]}$ ), 4.40 (dd,  $J = 7.8, 4.3$  Hz, 2H,  $\text{H}^b$ ), 4.31 – 4.20 (m, 2H,  $\text{H}^f$ ), 4.07 (t,  $J = 16.5$  Hz, 16H,  $\text{H}^{\text{CB}[8]}$ ), 3.97 – 3.83 (m, 8H,  $\text{H}^c + \text{H}^e$ ), 3.76 (q,  $J = 16.8$  Hz, 4H,  $\text{H}^d$ ), 3.17 (ddt,  $J = 28.7, 13.2, 7.0$  Hz, 4H,  $\text{H}^g$ ), 3.01 – 2.67 (m, 4H,  $\text{H}^a$ ).  $^{13}\text{C}$  NMR (126 MHz,  $\text{D}_2\text{O}$ )  $\delta$  32.24, 36.77, 42.09, 42.38, 42.49, 53.45, 54.43, 56.58, 71.93, 106.03, 106.15, 109.02, 109.18, 109.24, 121.52, 121.60, 126.24, 126.28, 128.01, 129.02, 129.16, 129.38, 133.72, 137.24, 137.32, 137.40, 142.35, 151.28, 152.44, 152.56, 152.84, 155.79, 155.85, 156.30, 156.66, 156.84, 157.90, 161.90, 162.01, 163.90, 164.00, 169.83, 170.78, 171.38, 171.67, 174.34, 176.65.  $^{19}\text{F}$  NMR (471 MHz,  $\text{D}_2\text{O}$ )  $\delta$  -107.03. HRMS (ESI):  $m/z = 1644.42682$  [ $\text{M}$ ] $^{2+}$  (calcd. 1644.4224 for  $\text{C}_{126}\text{H}_{124}\text{F}_4\text{N}_{48}\text{O}_{28}\text{Pt}_2\text{S}_2$ ). UV-Vis ( $\text{H}_2\text{O}$ )  $\lambda$  248 ( $\epsilon = 18.4 \times 10^3$ ), 279 ( $\epsilon = 21.4 \times 10^3$ ), 317 ( $\epsilon = 12.2 \times 10^3$ ), 374 ( $\epsilon = 3.55 \times 10^3$ ), 574 ( $\epsilon = 7.10 \times 10^2$ ).

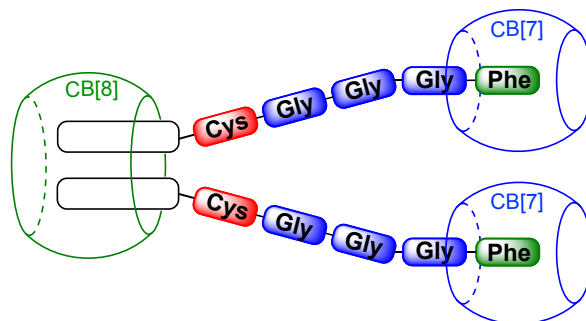

**CB[8]<sup>Pt</sup>·(1·CB[7]<sup>Phe</sup>)<sub>2</sub>.** <sup>1</sup>H NMR (500 MHz, D<sub>2</sub>O) δ 9.08 (dd, *J* = 20.8, 5.6 Hz, 4H, H<sup>6</sup>), 8.54 (t, *J* = 7.8 Hz, 4H, H<sup>3</sup>), 8.29 – 8.00 (m, 8H, H<sup>4</sup>+H<sup>3'</sup>), 7.67 – 7.47 (m, 4H, H<sup>5</sup>), 6.60 (s, 2H, H<sup>1</sup>), 6.56 – 6.43 (m, 10H, H<sup>7</sup>+H<sup>8</sup>+H<sup>i</sup>), 6.31 (s, 4H, H<sup>b</sup>), 5.70 (d, *J* = 15.3 Hz, 8H, H<sup>CB[8]</sup>), 5.65 – 5.52 (m, 36H, H<sup>CB[8]</sup>+H<sup>CB[7]</sup>), 5.35 (s, 28H, H<sup>CB[7]</sup>), 5.34 (s, 16H, H<sup>CB[8]</sup>), 4.39 (t, *J* = 5.9 Hz, 2H, H<sup>b</sup>), 4.26 (d, *J* = 10.8 Hz, 2H, H<sup>f</sup>), 4.19 – 3.96 (m, 48H, H<sup>CB[8]</sup>+H<sup>CB[7]</sup>+H<sup>c</sup>), 3.94 – 3.76 (m, 4H, H<sup>e</sup>), 3.75 – 3.55 (m, 4H, H<sup>d</sup>), 3.05 (d, *J* = 14.4 Hz, 2H, H<sup>g</sup>), 2.97 (d, *J* = 10.9 Hz, 2H, H<sup>a</sup>), 2.84 – 2.73 (m, 2H, H<sup>a</sup>), 2.49 (t, *J* = 13.6 Hz, 2H, H<sup>g</sup>). <sup>13</sup>C NMR (126 MHz, D<sub>2</sub>O) δ 174.22, 172.47, 171.64, 170.57, 170.35, 163.94, 162.03, 157.91, 156.88, 156.70, 156.25, 152.82, 152.44, 151.31, 142.42, 137.32, 133.66, 129.10, 128.00, 127.30, 126.35, 121.65, 109.23, 109.04, 106.20, 105.97, 71.95, 71.14, 56.46, 54.90, 53.48, 52.50, 43.48, 42.49, 41.93, 36.08, 32.09. <sup>19</sup>F NMR (471 MHz, D<sub>2</sub>O) δ -106.91. HRMS (ESI): *m/z* = 1403.38324 [M+2H]<sup>4+</sup> (calcd. 1403.38286 for C<sub>210</sub>H<sub>208</sub>F<sub>4</sub>N<sub>104</sub>O<sub>56</sub>Pt<sub>2</sub>S<sub>2</sub>). UV-Vis (H<sub>2</sub>O) λ 248 (ε = 20.1 × 10<sup>3</sup>), 279 (ε = 23.6 × 10<sup>3</sup>), 318 (ε = 12.1 × 10<sup>3</sup>), 375 (ε = 3.78 × 10<sup>3</sup>), 541 (ε = 8.30 × 10<sup>2</sup>).

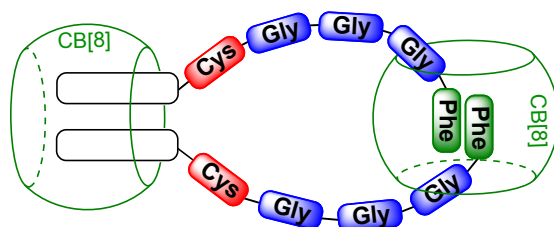

**CB[8]<sup>Pt</sup>·1<sub>2</sub>·CB[8]<sup>PheHT</sup>.** <sup>1</sup>H NMR (500 MHz, D<sub>2</sub>O) δ 9.29 (d, *J* = 5.6 Hz, 2H, H<sup>6</sup>), 9.19 (d, *J* = 5.5 Hz, 2H, H<sup>6</sup>), 8.70 (d, *J* = 8.0 Hz, 2H, H<sup>3</sup>), 8.66 (d, *J* = 8.0 Hz, 2H, H<sup>3</sup>), 8.41 – 8.10 (m, 8H, H<sup>4</sup>+H<sup>3'</sup>), 7.70 (q, *J* = 8.2, 7.7 Hz, 4H, H<sup>5</sup>), 6.83 – 6.61 (m, 8H, H<sup>7</sup>+H<sup>8</sup>+H<sup>i</sup>), 6.56 – 6.36 (m, 4H, H<sup>i</sup>), 6.03 (d, *J* = 7.6 Hz, 4H, H<sup>b</sup>), 5.86 (d, *J* = 15.3 Hz, 24H, H<sup>CB[8]</sup>), 5.74 (d, *J* = 15.3 Hz, 8H, H<sup>CB[8]</sup>), 5.64 (s, 16H, H<sup>CB[8]</sup>), 5.48 (s, 16H, H<sup>CB[8]</sup>), 4.53 (t, *J* = 6.2 Hz, H<sup>b</sup>), 4.43 (d, *J* = 17.3 Hz, H<sup>f</sup>), 4.30 (d, *J* = 15.2 Hz, 16H, H<sup>CB[8]</sup>), 4.23 – 4.11 (m, 24H, H<sup>CB[8]</sup>+H<sup>c</sup>+H<sup>e</sup>), 4.01 – 3.85 (m, , 4H, H<sup>d</sup>), 3.10 – 3.00 (m, 2H, H<sup>a</sup>), 2.97 – 2.87 (m, 2H, H<sup>a</sup>), 2.39 (d, *J* = 13.0 Hz, 2H, H<sup>g</sup>), 2.25 (t, *J* = 13.2 Hz, 2H, H<sup>g</sup>). <sup>13</sup>C NMR (176 MHz, D<sub>2</sub>O) δ 174.22, 172.30, 171.77, 170.59, 170.24, 163.74, 163.67, 162.31, 162.24, 157.90, 157.87, 156.91, 156.89, 156.81, 156.78, 156.76, 156.69, 153.90, 152.95, 152.90, 152.86, 152.46, 151.26, 142.76, 142.40, 137.32, 132.78, 129.14, 129.06, 128.95, 127.77, 126.64, 126.33, 126.25, 121.60, 121.49, 109.21, 109.07, 106.33, 106.18, 106.03, 72.04, 71.95, 56.38, 54.97, 53.62, 53.47, 43.26, 42.63, 41.97, 37.16, 32.01. <sup>19</sup>F NMR (471 MHz, D<sub>2</sub>O) δ -107.06. HRMS (ESI): *m/z* = 1538.73924 [M+H]<sup>3+</sup> (calcd. 1538.74316 for C<sub>174</sub>H<sub>171</sub>F<sub>4</sub>N<sub>80</sub>O<sub>44</sub>Pt<sub>2</sub>S<sub>2</sub>). UV-Vis (H<sub>2</sub>O) λ 249 (ε = 18.4 × 10<sup>3</sup>), 279 (ε = 22.5 × 10<sup>3</sup>), 317 (ε = 12.3 × 10<sup>3</sup>), 375 (ε = 3.66 × 10<sup>3</sup>), 544 (ε = 9.13 × 10<sup>2</sup>).

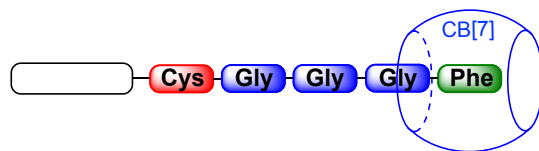

**1·CB[7]<sup>Phe</sup>.** <sup>1</sup>H NMR (500 MHz, D<sub>2</sub>O) δ 8.82 (s, 2H, H<sup>6</sup>), 8.27 (s, 2H, H<sup>3</sup>), 8.16 (s, 4H, H<sup>4</sup>+H<sup>3</sup>), 7.57 (s, 2H, H<sup>5</sup>), 7.25 (s, 2H, H<sup>7</sup>), 7.01 (s, 1H, H<sup>8</sup>), 6.72 (s, 1H, H<sup>i</sup>), 6.64 (s, 2H, H<sup>i</sup>), 6.50 (s, 2H, H<sup>h</sup>), 5.58 (d, *J* = 15.4 Hz, 14H, H<sup>CB[7]</sup>), 5.34 (s, 14H, H<sup>CB[7]</sup>), 4.34 (s, 1H, H<sup>b</sup>), 4.20 (d, *J* = 10.8 Hz, 1H, H<sup>f</sup>), 4.04 (d, *J* = 15.4 Hz, 14H, H<sup>CB[7]</sup>), 3.98 – 3.88 (m, 2H, H<sup>c</sup>), 3.77 (q, *J* = 17.5, 17.0 Hz, 2H, H<sup>c</sup>), 3.66 – 3.47 (m, 2H, H<sup>d</sup>), 2.90 (dd, *J* = 47.7, 14.5 Hz, 2H, H<sup>g</sup>), 2.60 (dt, *J* = 56.2, 13.0 Hz, 2H, H<sup>a</sup>). <sup>13</sup>C NMR (176 MHz, D<sub>2</sub>O) δ 174.45, 172.10, 171.42, 170.33, 170.31, 164.07, 164.00, 162.66, 162.58, 157.80, 156.23, 153.36, 152.42, 151.19, 142.51, 137.66, 133.64, 129.33, 128.28, 127.82, 127.66, 125.72, 110.57, 71.13, 56.84, 54.72, 52.48, 43.13, 42.48, 41.87, 36.28, 31.81. <sup>19</sup>F NMR (471 MHz, D<sub>2</sub>O) δ -107.86. HRMS (ESI): *m/z* = 1071.28488 [M+H]<sup>2+</sup> (calcd. 1071.28463 for C<sub>81</sub>H<sub>80</sub>F<sub>2</sub>N<sub>36</sub>O<sub>20</sub>Pt<sub>1</sub>S<sub>1</sub>). HRMS (MALDI): *m/z* = 2141.569 [M]<sup>+</sup> (calcd. 2141.562 for C<sub>81</sub>H<sub>79</sub>F<sub>2</sub>N<sub>36</sub>O<sub>20</sub>Pt<sub>1</sub>S<sub>1</sub>). UV-Vis (H<sub>2</sub>O) λ 250 (ε = 23.5 × 10<sup>3</sup>), 289 (ε = 27.4 × 10<sup>3</sup>), 348 (ε = 8.54 × 10<sup>3</sup>), 500 (ε = 1.06 × 10<sup>3</sup>).

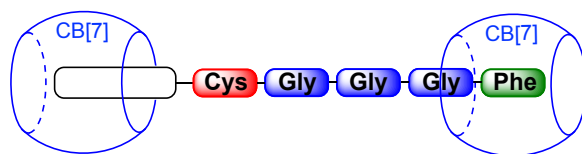

**CB[7]<sup>Pt</sup>·1·CB[7]<sup>Phe</sup>.** <sup>1</sup>H NMR (500 MHz, D<sub>2</sub>O) δ 9.19 (d, *J* = 4.6 Hz, 2H, H<sup>6</sup>), 9.15 (d, *J* = 8.0 Hz, 2H, H<sup>3</sup>), 8.67 (s, 2H, H<sup>3</sup>), 8.40 (t, *J* = 7.7 Hz, 2H, H<sup>4</sup>), 7.79 (t, *J* = 6.8 Hz, 2H, H<sup>5</sup>), 6.76 (d, *J* = 7.1 Hz, 2H, H<sup>7</sup>), 6.65 (t, *J* = 7.5 Hz, 1H, H<sup>8</sup>), 6.58 – 6.45 (m, 3H, H<sup>i</sup>+H<sup>j</sup>), 6.34 (d, *J* = 7.5 Hz, 2H, H<sup>h</sup>), 5.73 (d, *J* = 15.4 Hz, 7H, H<sup>CB[7]</sup>), 5.67 (d, *J* = 15.5 Hz, 7H, H<sup>CB[7]</sup>), 5.62 (dd, *J* = 15.2, 4.3 Hz, 14H, H<sup>CB[7]</sup>), 5.40 (d, *J* = 4.8 Hz, 28H, H<sup>CB[7]</sup>), 4.57 – 4.53 (m, 1H, H<sup>b</sup>), 4.39 – 4.29 (m, 1H, H<sup>f</sup>), 4.17 (s, 2H, H<sup>c</sup>), 4.15 – 4.03 (m, 28H, H<sup>CB[7]</sup>), 4.02 – 3.57 (m, 4H, H<sup>d</sup>+H<sup>e</sup>), 3.04 (d, *J* = 13.0 Hz, 2H, H<sup>g</sup>), 2.98 – 2.89 (m, 1H, H<sup>a</sup>), 2.58 – 2.43 (m, 1H, H<sup>a</sup>). <sup>13</sup>C NMR (176 MHz, D<sub>2</sub>O) δ 174.26, 172.56, 171.63, 170.56, 163.72, 163.64, 162.30, 162.22, 159.85, 156.36, 156.29, 156.21, 156.14, 153.46, 151.77, 142.18, 139.45, 133.65, 128.54, 127.98, 127.94, 127.53, 127.23, 127.19, 126.63, 123.70, 109.31, 109.28, 109.18, 109.15, 103.93, 71.18, 71.13, 71.11, 55.85, 54.89, 52.53, 52.50, 52.47, 46.51, 43.55, 42.47, 42.00, 36.06. <sup>19</sup>F NMR (471 MHz, D<sub>2</sub>O) δ -109.96. HRMS (ESI): *m/z* = 1652.45424 [M+H]<sup>2+</sup> (calcd. 1652.45652 for C<sub>123</sub>H<sub>122</sub>F<sub>2</sub>N<sub>64</sub>O<sub>34</sub>Pt<sub>1</sub>S<sub>1</sub>). UV-Vis (H<sub>2</sub>O) λ 260 (ε = 24.0 × 10<sup>3</sup>), 289 (ε = 31.4 × 10<sup>3</sup>), 345 (ε = 10.6 × 10<sup>3</sup>), 484 (ε = 1.02 × 10<sup>3</sup>).

#### 4. $^1\text{H}$ and $^{13}\text{C}$ NMR spectra of the Pt/peptide/CB[n] assemblies

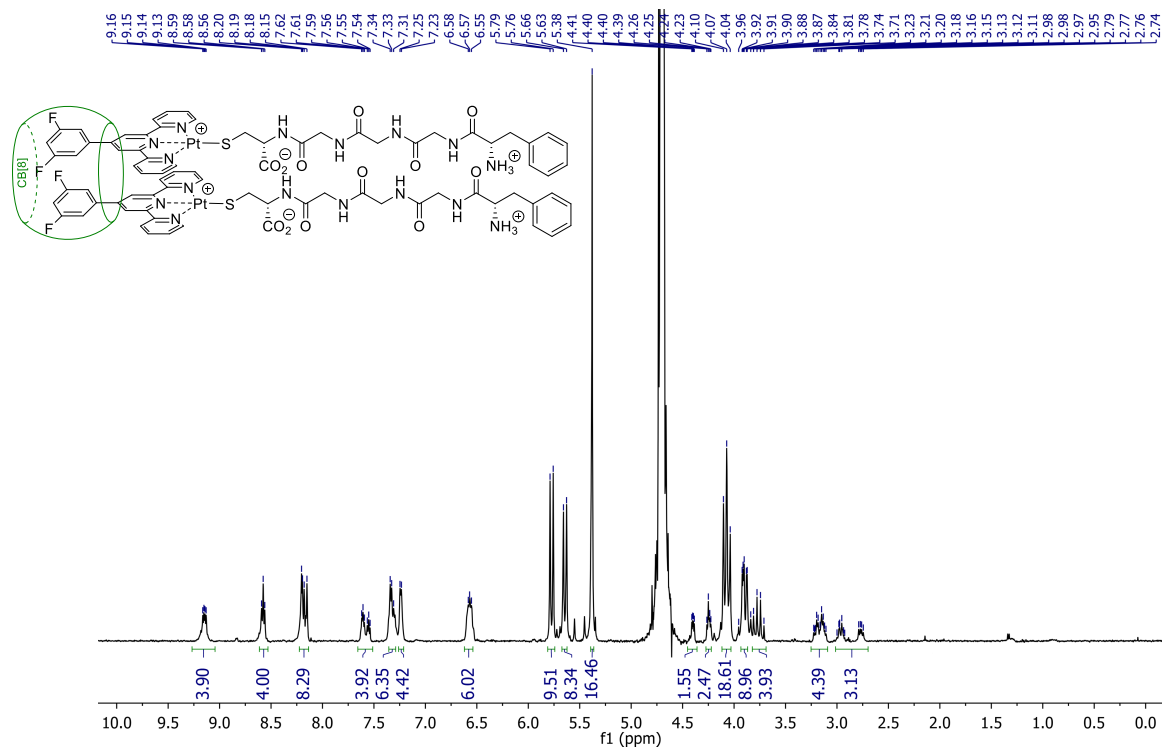

Figure S1.  $^1\text{H}$ -NMR spectrum of assembly  $\text{CB}[8]^{\text{Pt}} \cdot 12$  in  $\text{D}_2\text{O}$ .

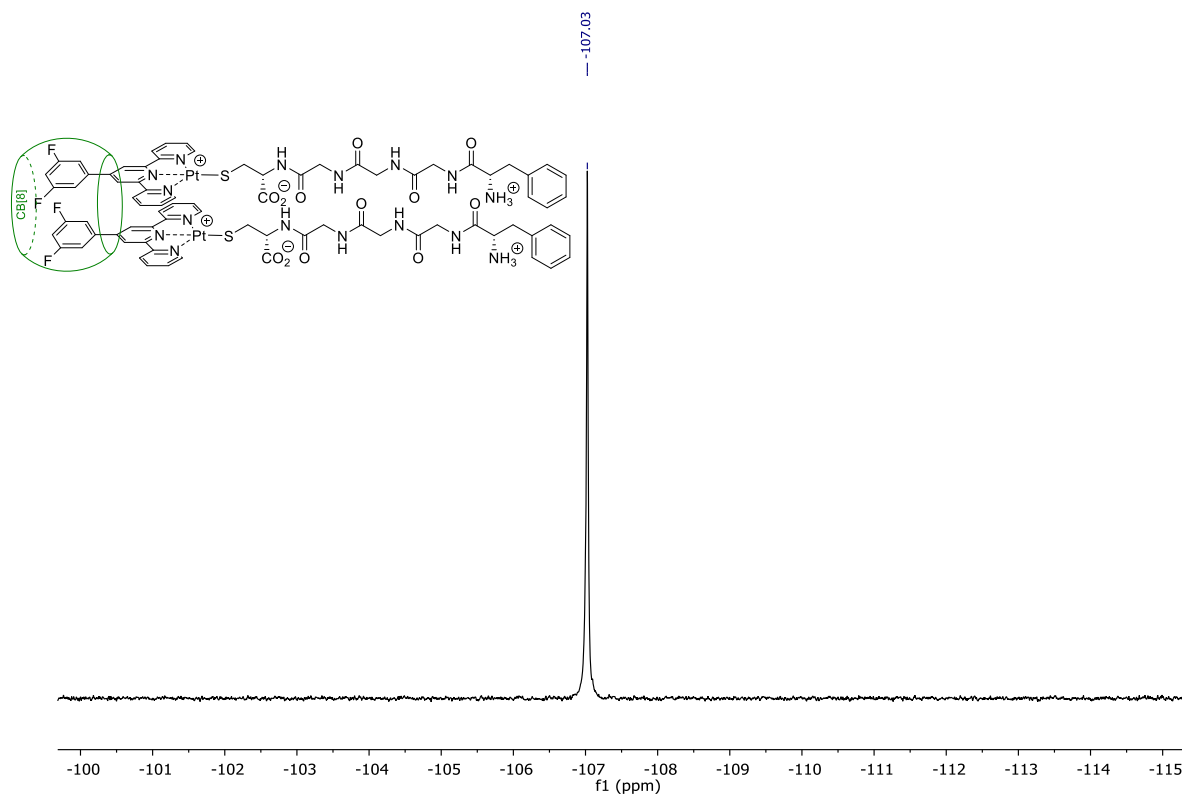

Figure S2.  $^{19}\text{F}\{^1\text{H}\}$ -NMR spectrum of assembly  $\text{CB}[8]^{\text{Pt}} \cdot 12$  in  $\text{D}_2\text{O}$ .

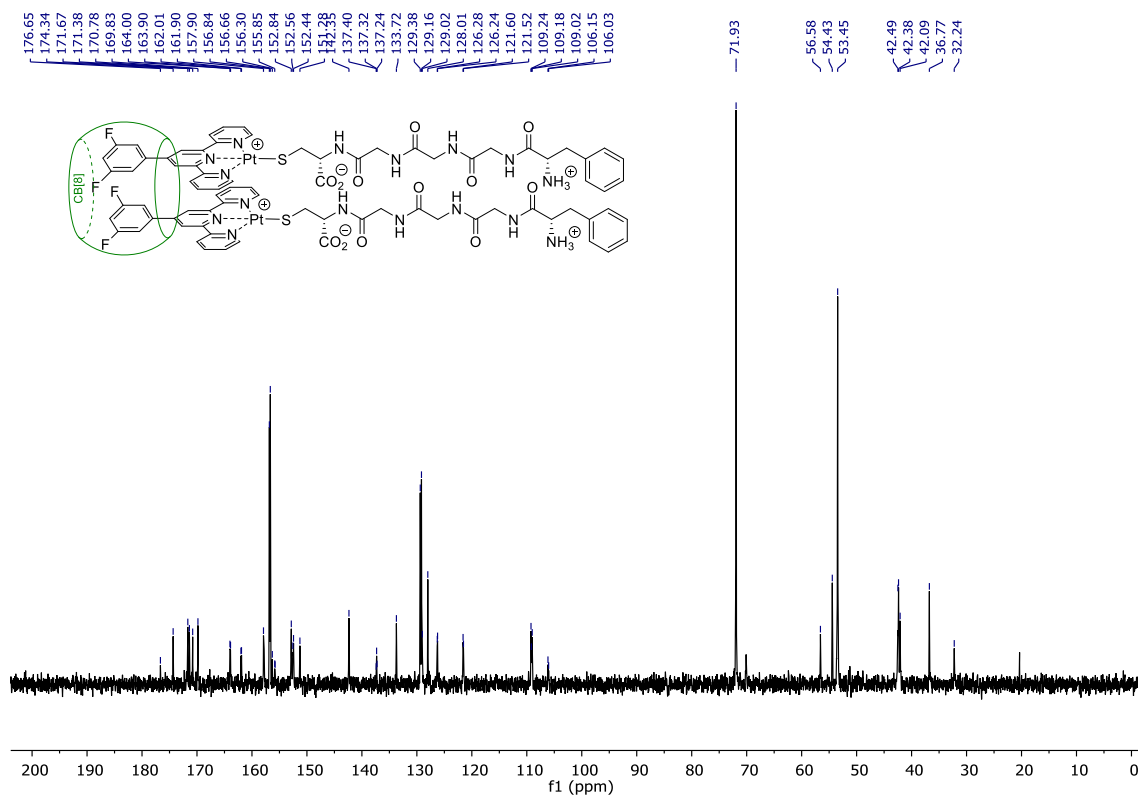

Figure S3.  $^{13}\text{C}\{^1\text{H}\}$ -NMR spectrum of assembly  $\text{CB}[8]^{\text{Pt}} \cdot \mathbf{1}_2$  in  $\text{D}_2\text{O}$ .

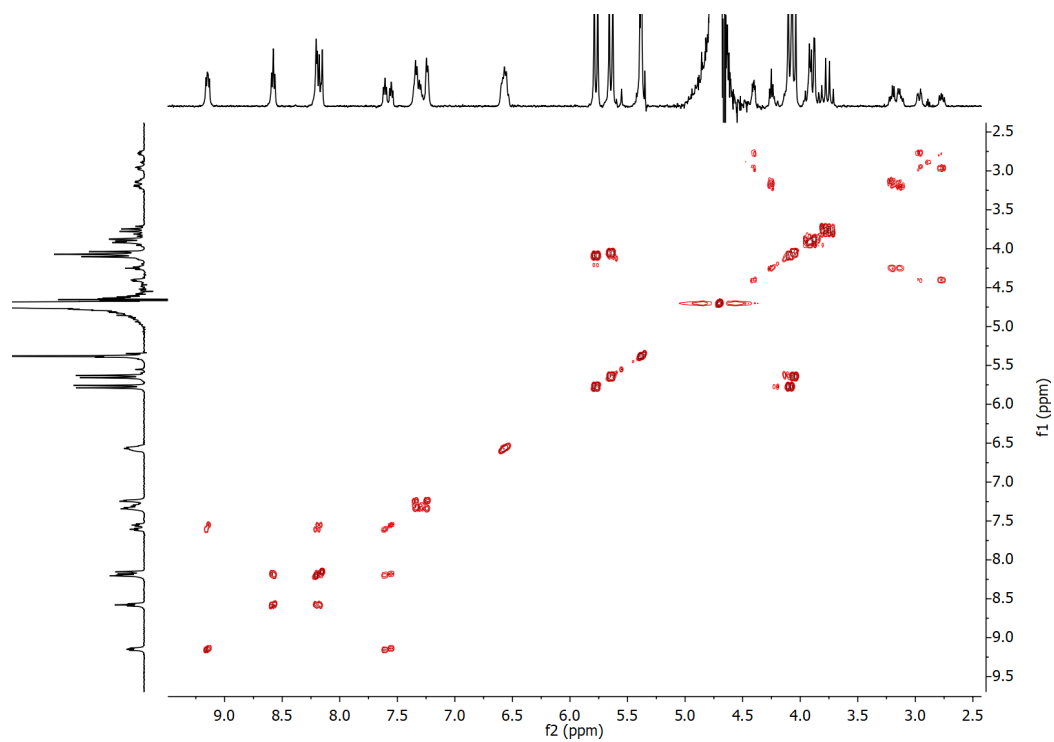

Figure S4.  $^1\text{H}$ - $^1\text{H}$  COSY NMR spectrum of assembly  $\text{CB}[8]^{\text{Pt}} \cdot \mathbf{1}_2$  in  $\text{D}_2\text{O}$ .

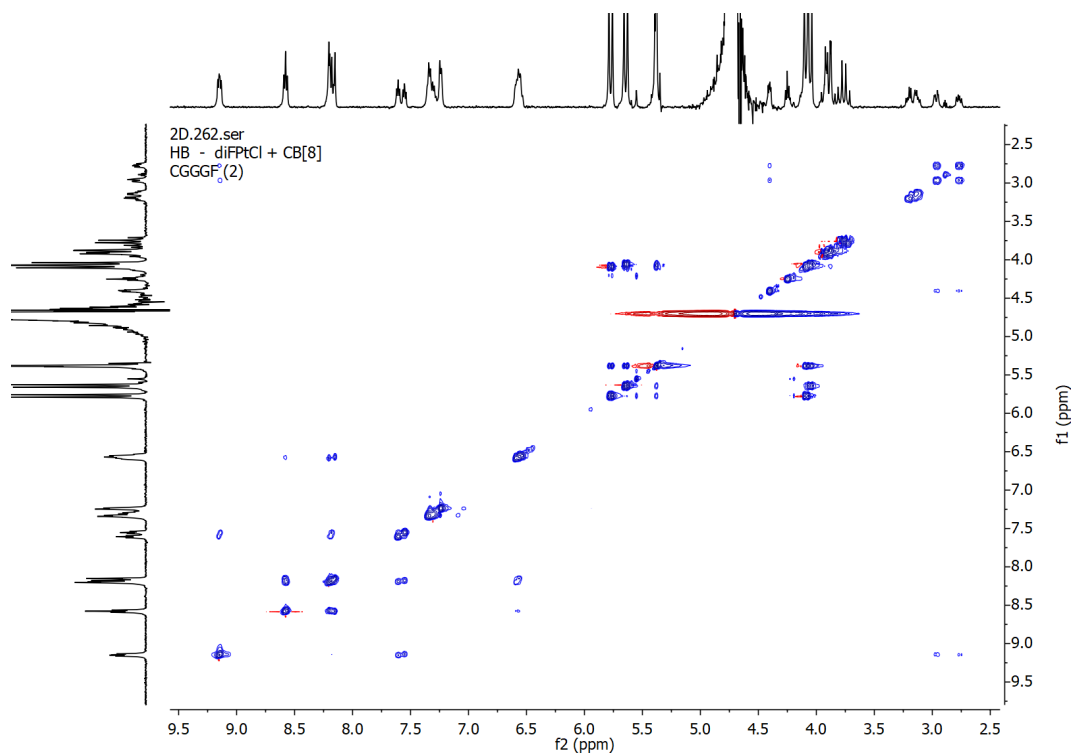

Figure S5.  $^1\text{H}$ - $^1\text{H}$  NOESY NMR spectrum of assembly  $\text{CB}[8]^{\text{Pt}}\cdot 1_2$  in  $\text{D}_2\text{O}$ .

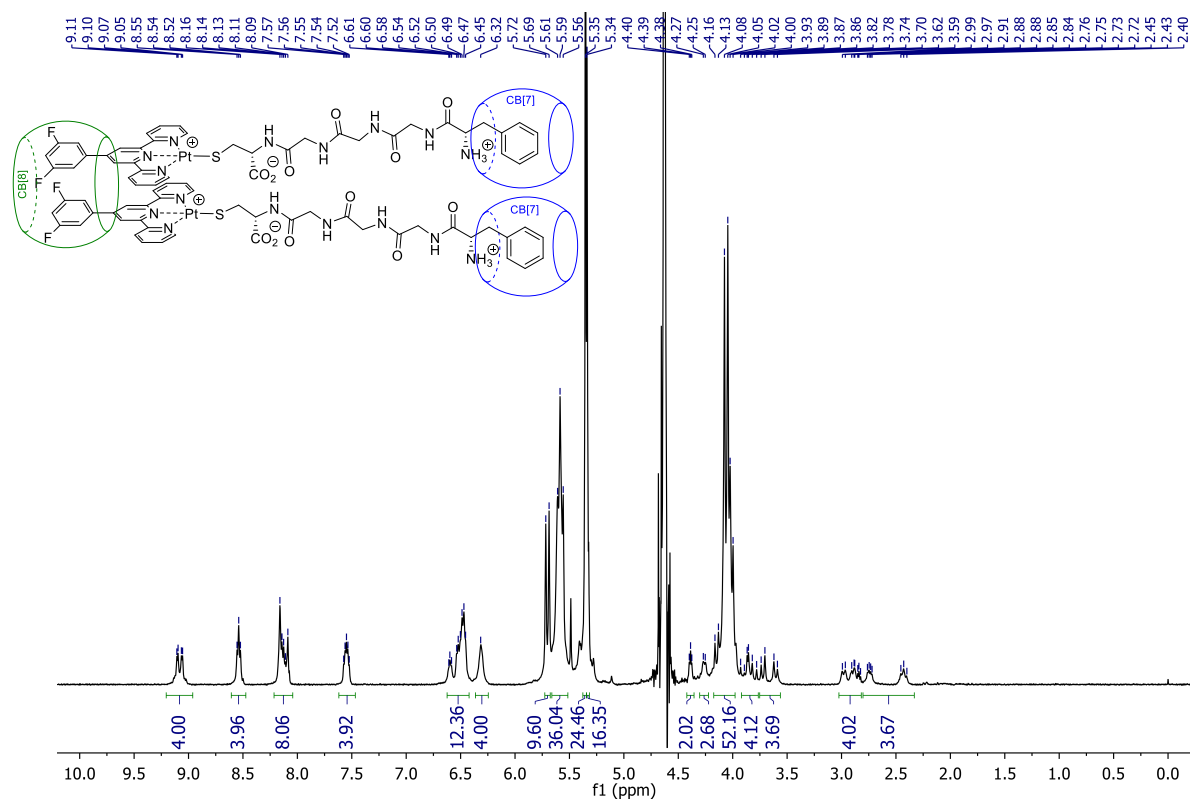

Figure S6.  $^1\text{H}$ -NMR spectrum of assembly  $\text{CB}[8]^{\text{Pt}}\cdot (1\cdot \text{CB}[7]^{\text{Phc}})_2$  in  $\text{D}_2\text{O}$ .



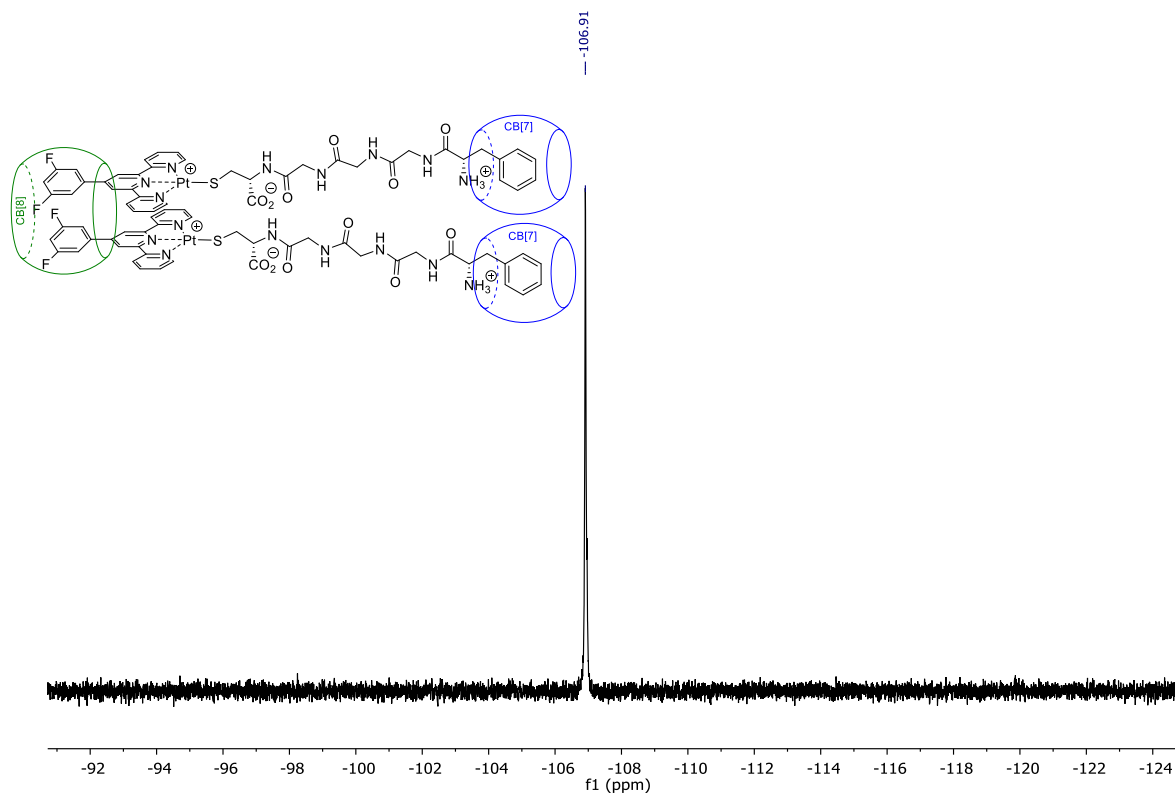

Figure S7.  $^{19}\text{F}\{^1\text{H}\}$ -NMR spectrum of assembly  $\text{CB}[8]^{\text{Pt}} \cdot (\mathbf{1} \cdot \text{CB}[7]^{\text{Phe}})_2$  in  $\text{D}_2\text{O}$ .

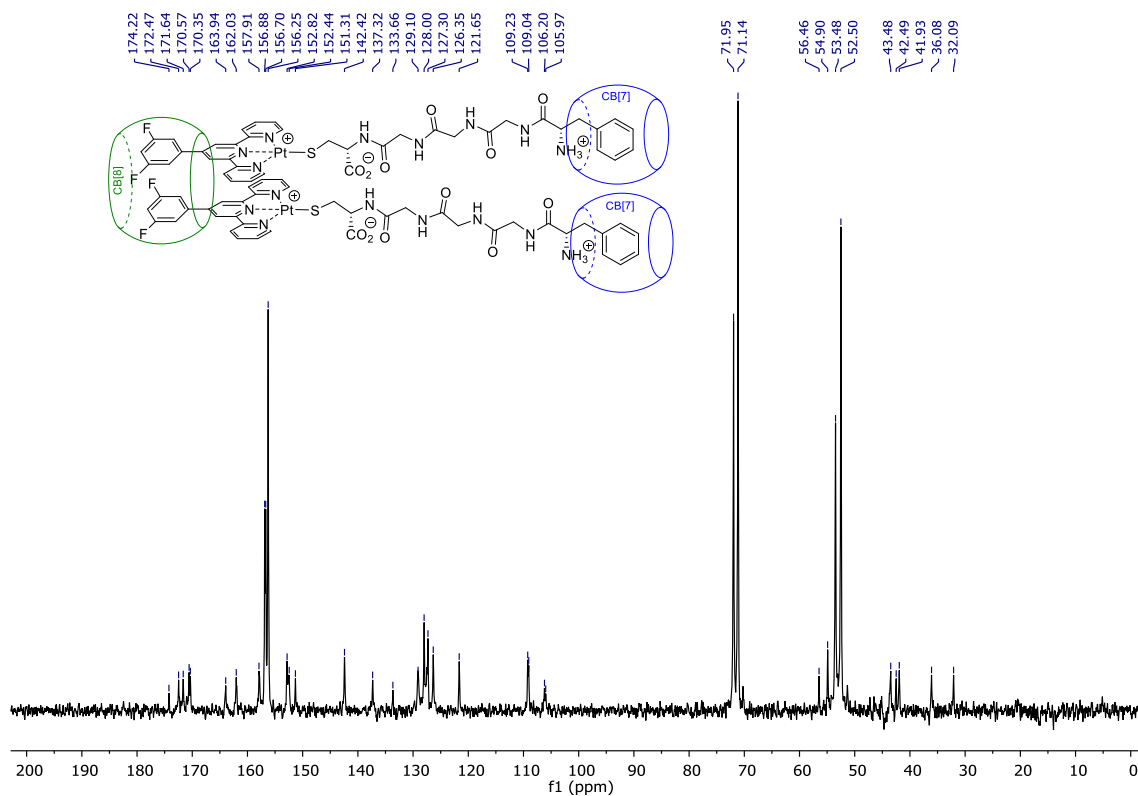

Figure S8.  $^{13}\text{C}\{^1\text{H}\}$ -NMR spectrum of assembly  $\text{CB}[8]^{\text{Pt}} \cdot (\mathbf{1} \cdot \text{CB}[7]^{\text{Phe}})_2$  in  $\text{D}_2\text{O}$ .

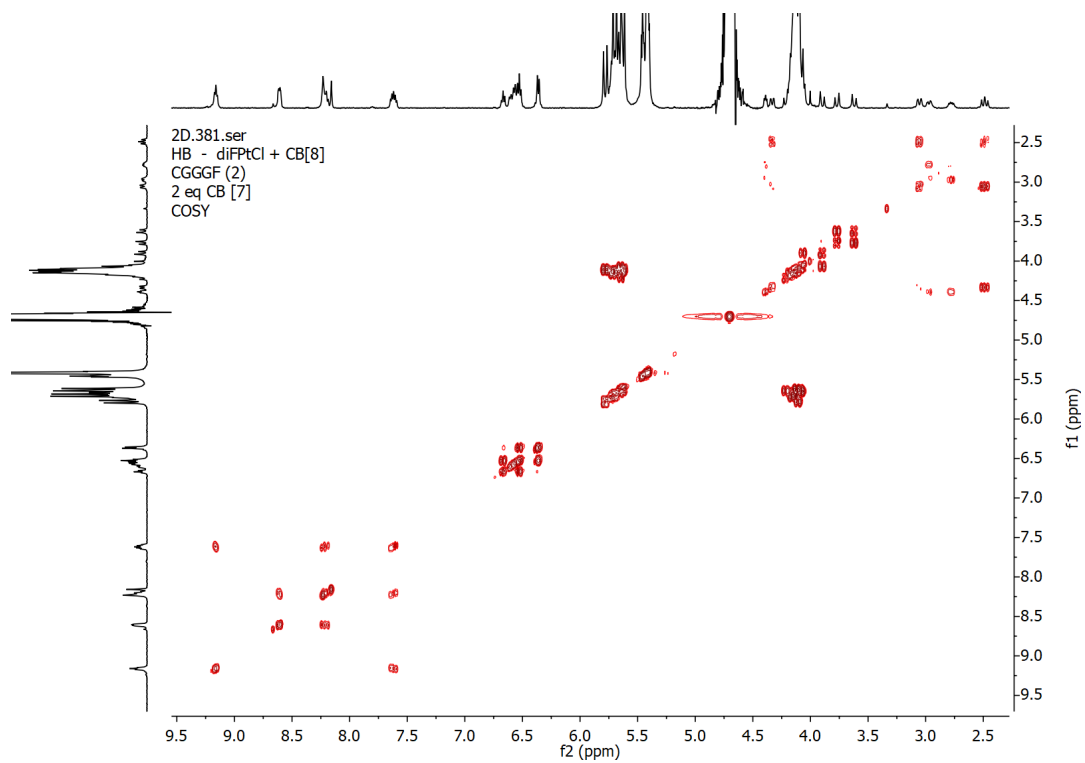

Figure S9. <sup>1</sup>H-<sup>1</sup>H COSY NMR spectrum of assembly CB[8]<sup>Pt</sup>·(1-CB[7]<sup>Phe</sup>)<sub>2</sub> in D<sub>2</sub>O.

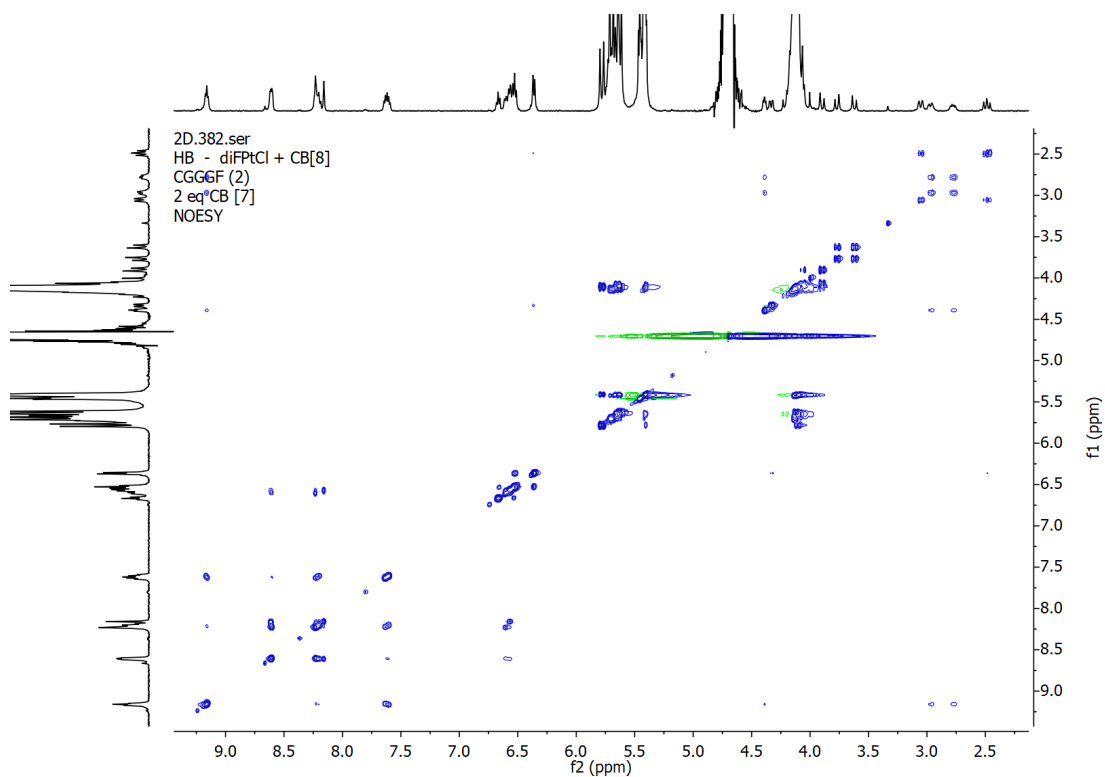

Figure S10. <sup>1</sup>H-<sup>1</sup>H NOESY NMR spectrum of assembly CB[8]<sup>Pt</sup>·(1-CB[7]<sup>Phe</sup>)<sub>2</sub> in D<sub>2</sub>O.

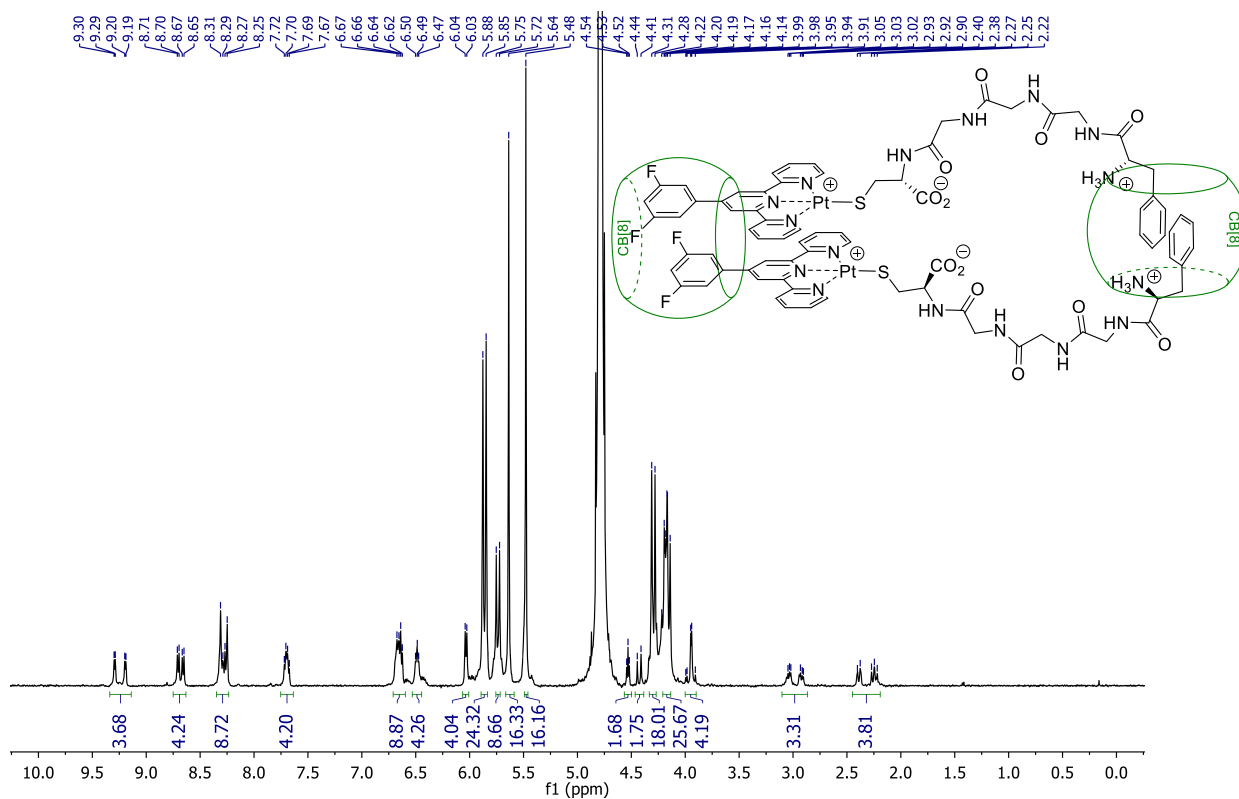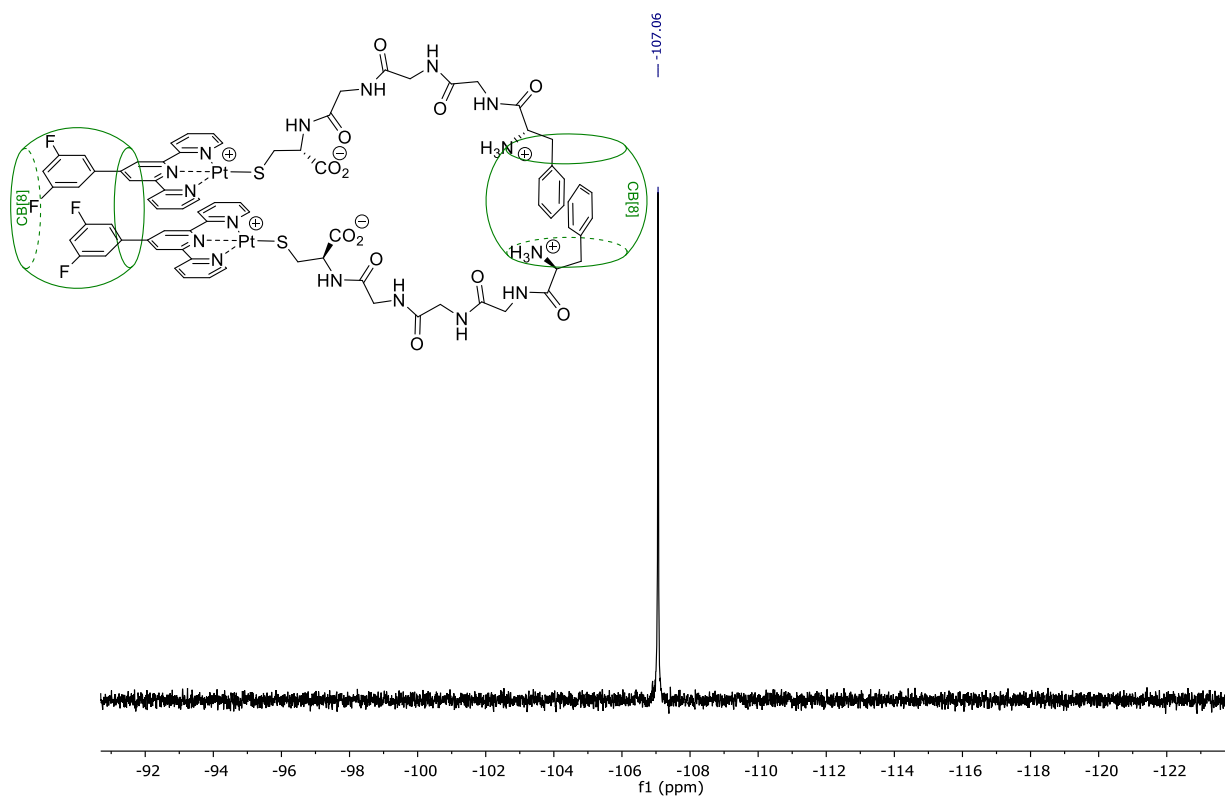

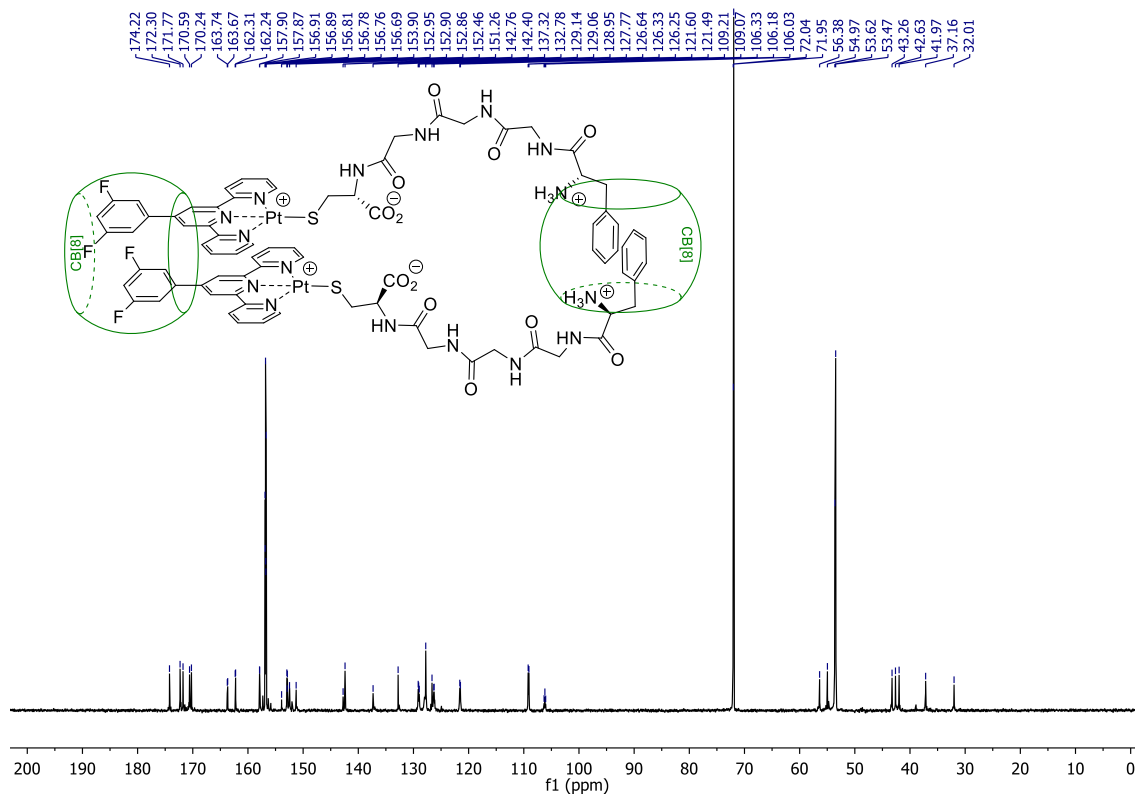

Figure S13.  $^{13}\text{C}\{^1\text{H}\}$ -NMR spectrum of assembly  $\text{CB}[8]^{\text{Pt}} \cdot 12 \cdot \text{CB}[8]^{\text{Phe}}_{\text{HT}}$  in  $\text{D}_2\text{O}$ .

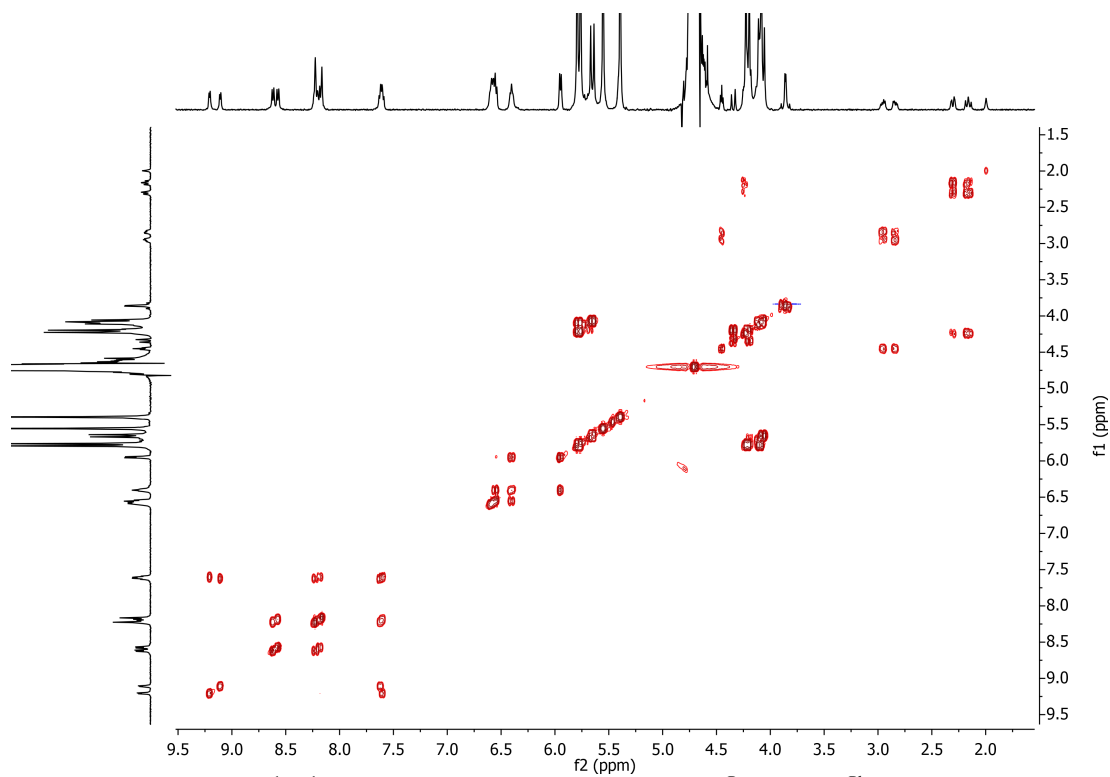

Figure S14.  $^1\text{H}$ - $^1\text{H}$  COSY spectrum of assembly  $\text{CB}[8]^{\text{Pt}} \cdot 12 \cdot \text{CB}[8]^{\text{Phe}}_{\text{HT}}$  in  $\text{D}_2\text{O}$ .

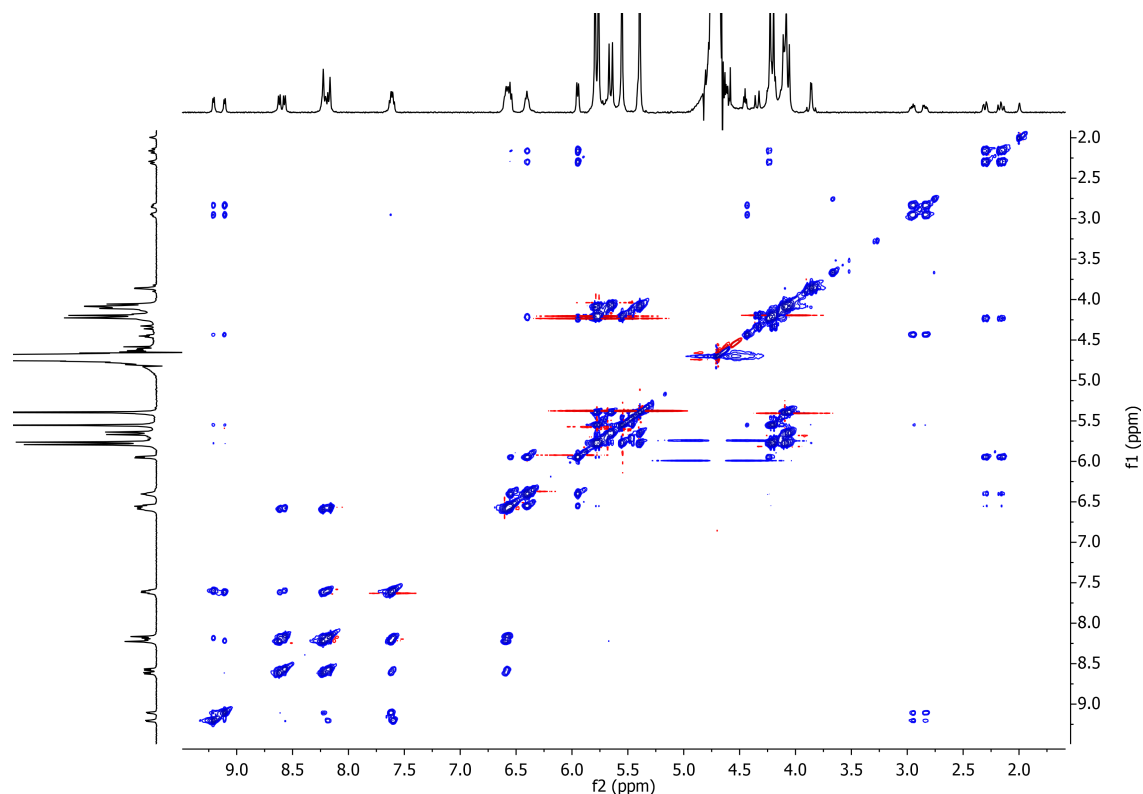

Figure S15.  $^1\text{H}$ - $^1\text{H}$  NOESY spectrum of assembly  $\text{CB}[8]^{\text{Pt}} \cdot 12 \cdot \text{CB}[8]^{\text{Phe}}_{\text{HT}}$  in  $\text{D}_2\text{O}$ .

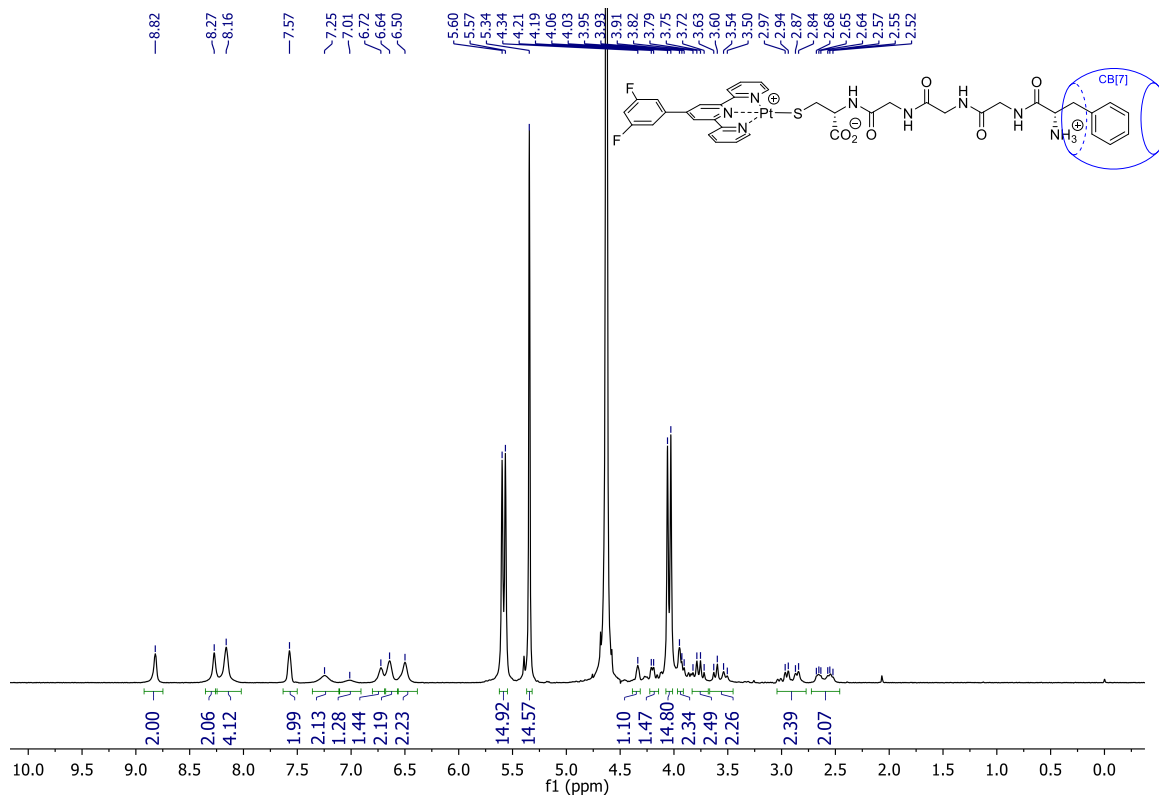

Figure S16.  $^1\text{H}$ -NMR spectrum of assembly  $1 \cdot \text{CB}[7]^{\text{Phe}}$  in  $\text{D}_2\text{O}$ .

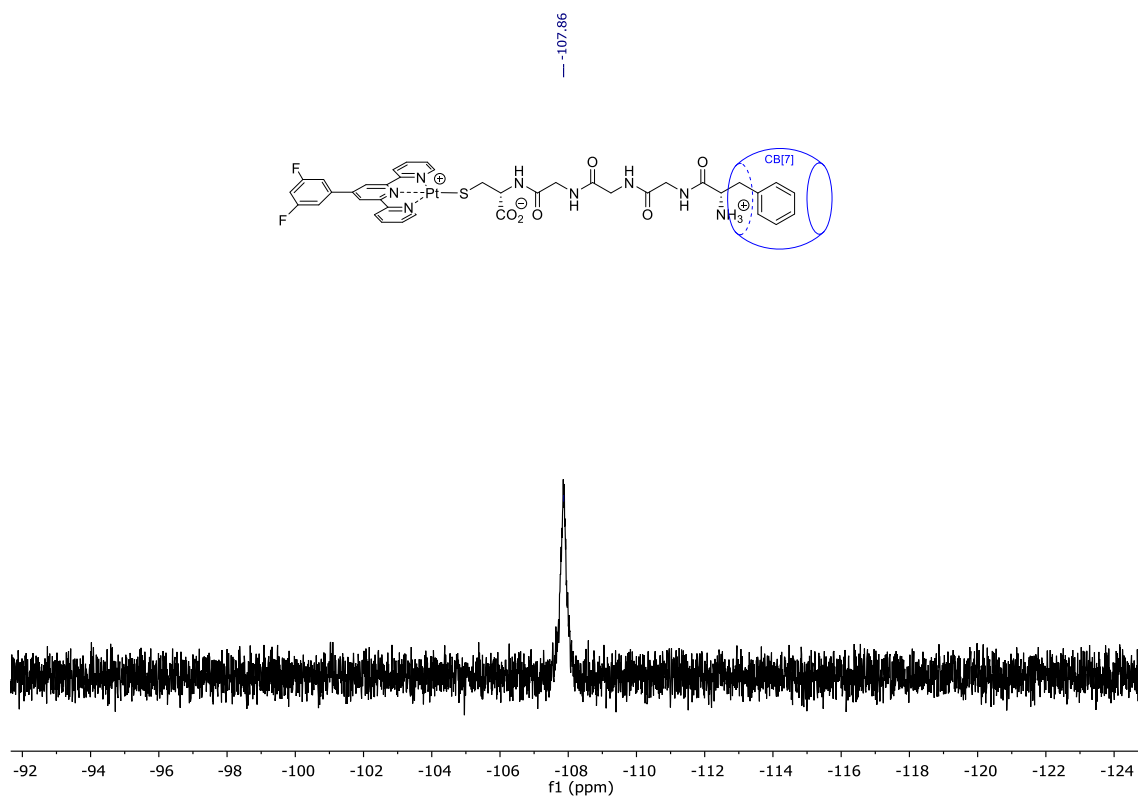

Figure S17.  $^{19}\text{F}\{^1\text{H}\}$ -NMR spectrum of  $1 \cdot \text{CB}[7]^{\text{Phe}}$  assembly in  $\text{D}_2\text{O}$ .

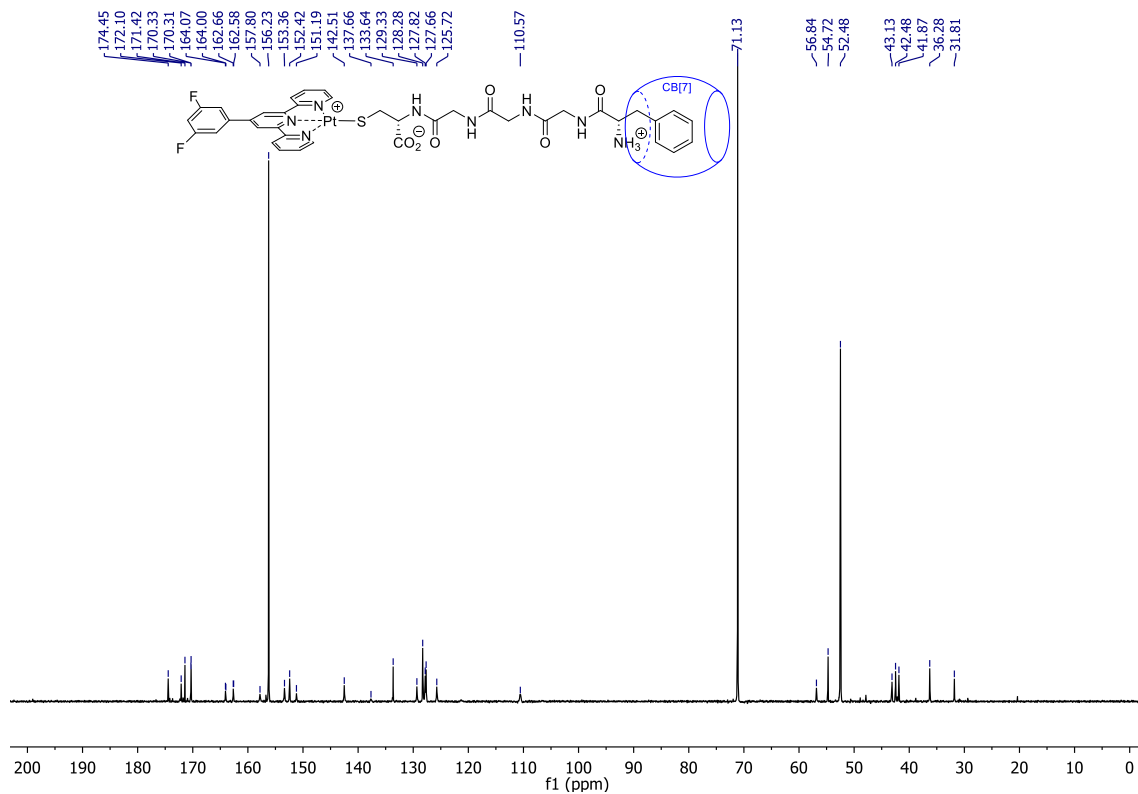

Figure S18.  $^{13}\text{C}\{^1\text{H}\}$ -NMR spectrum of assembly  $1 \cdot \text{CB}[7]^{\text{Phe}}$  in  $\text{D}_2\text{O}$ .

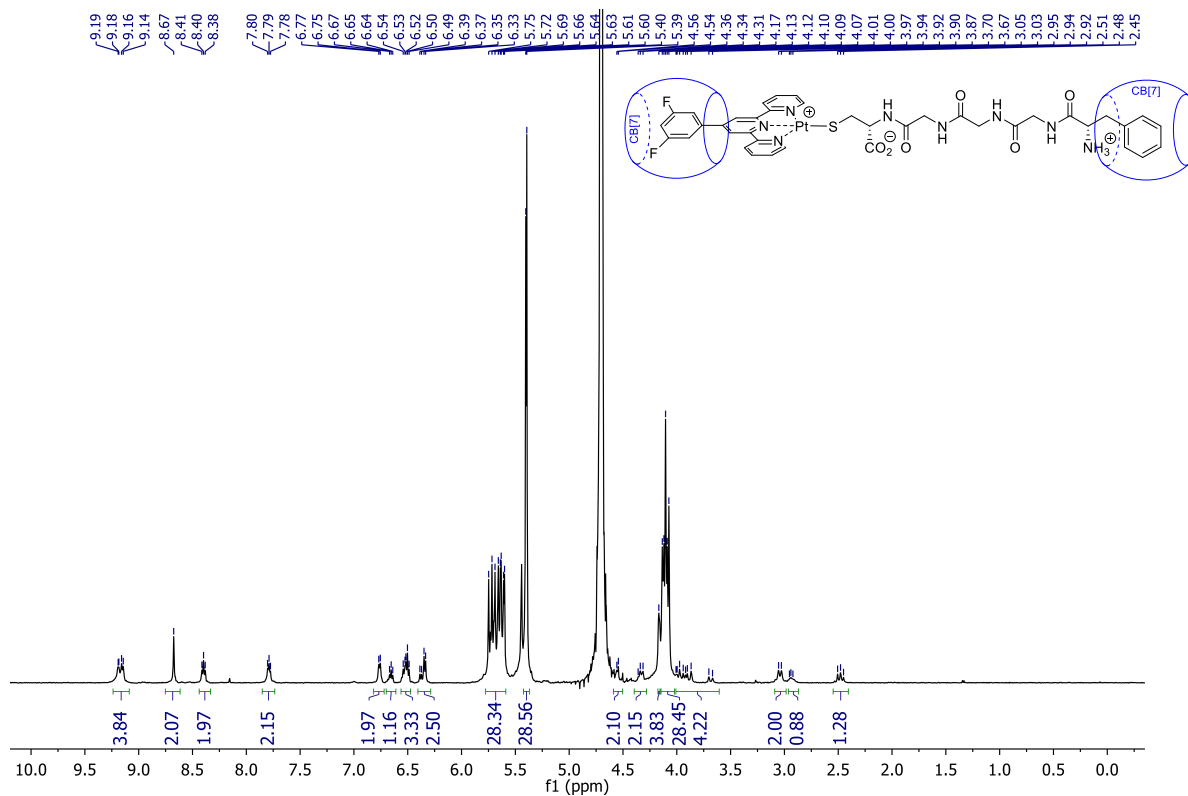

Figure S19.  $^1\text{H}$ -NMR spectrum of assembly  $\text{CB}[7]^{\text{Pt}} \cdot 1\text{-CB}[7]^{\text{Phe}}$  in  $\text{D}_2\text{O}$ .

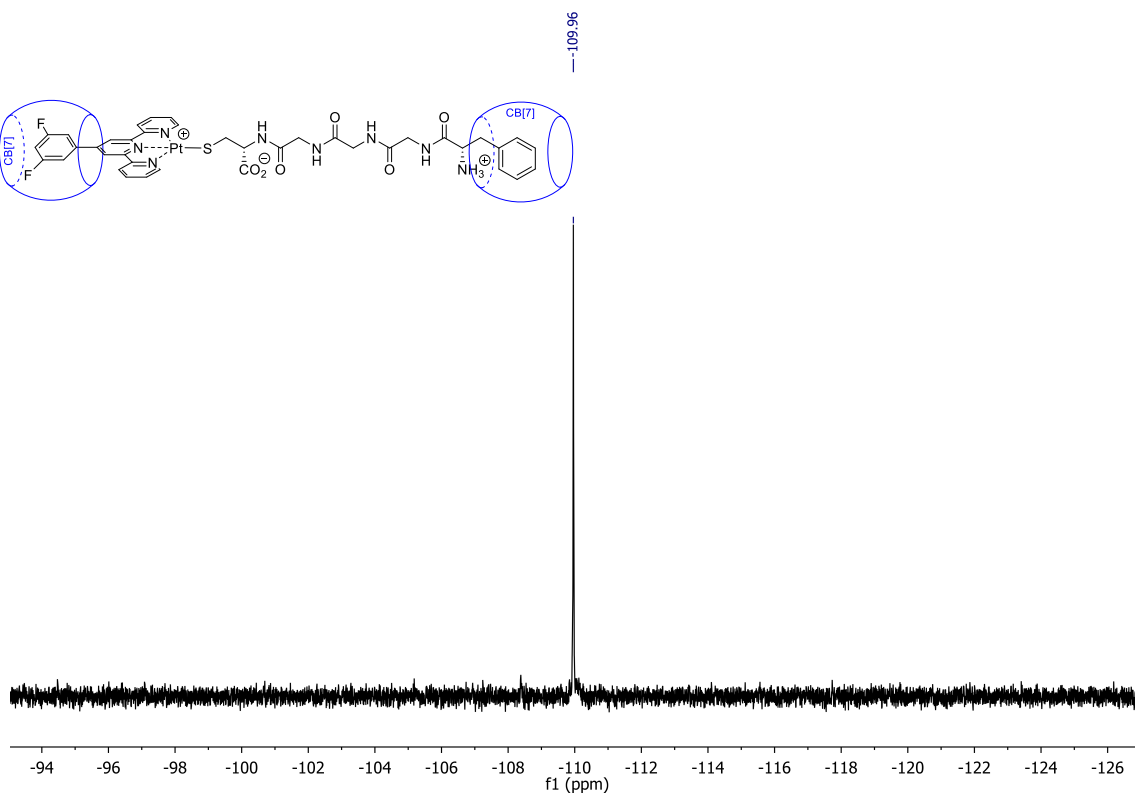

Figure S20.  $^{19}\text{F}\{^1\text{H}\}$ -NMR spectrum of assembly  $\text{CB}[7]^{\text{Pt}} \cdot 1\text{-CB}[7]^{\text{Phe}}$  in  $\text{D}_2\text{O}$ .

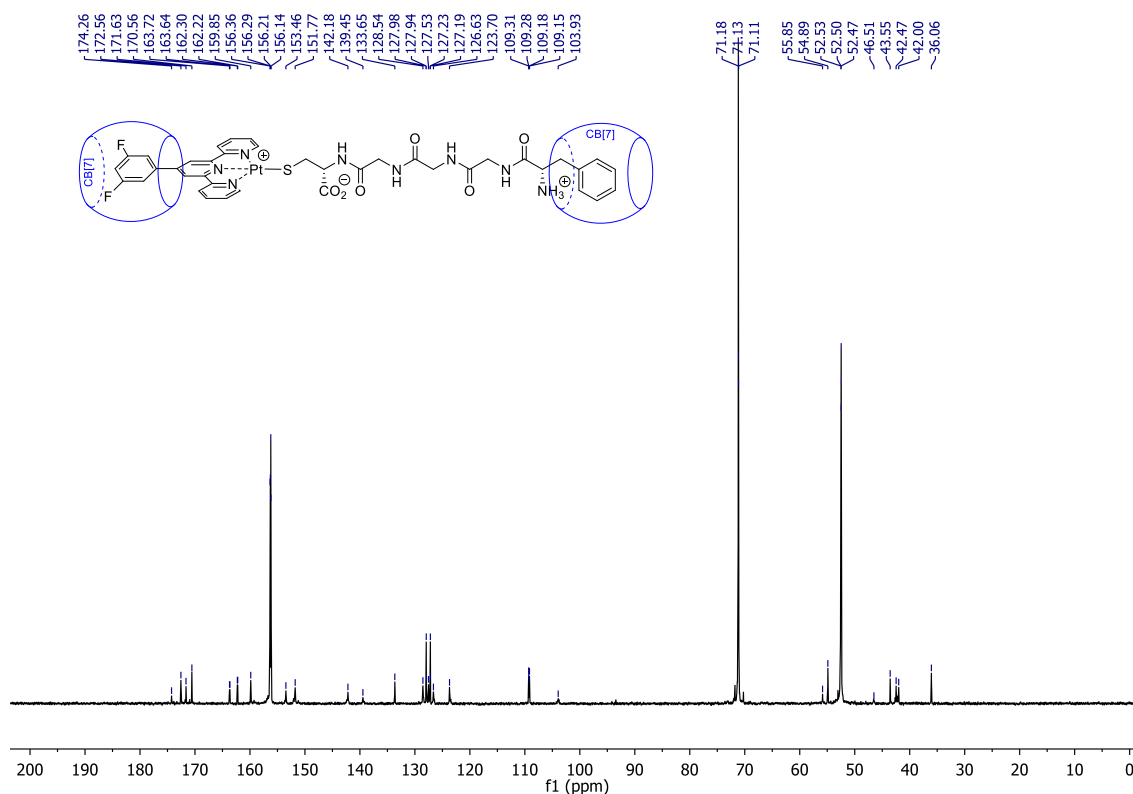

**Figure S21.**  $^{13}\text{C}\{^1\text{H}\}$ -NMR spectrum of assembly  $\text{CB}[7]^{\text{Pt}} \cdot 1 \cdot \text{CB}[7]^{\text{Phe}}$  in  $\text{D}_2\text{O}$ .

### 5. DOSY analysis for assemblies $\text{CB}[8]^{\text{Pt}} \cdot 1_2$ and $\text{CB}[8]^{\text{Pt}} \cdot 1_2 \cdot \text{CB}[8]^{\text{Phe}}_{\text{HT}}$

Diffusion constants obtained by DOSY experiments<sup>4-6</sup> were calculated by means of  $^1\text{H}$ -NMR signals intensity attenuation upon field gradient application, fitted according to the Stejskal–Tanner Equation (1):<sup>4,7</sup>

$$I = I_0 e^{-D\gamma^2 g^2 \delta^2 (\Delta - \delta/3)} \quad (1)$$

Magnetic field gradient length ( $\delta$ ) was set to 1.5 ms and diffusion delay ( $\Delta$ ) to 0.1 s. The experimental setup consisted of 19 spectra with a gradient strength variation of 5% between two consecutive experiments.



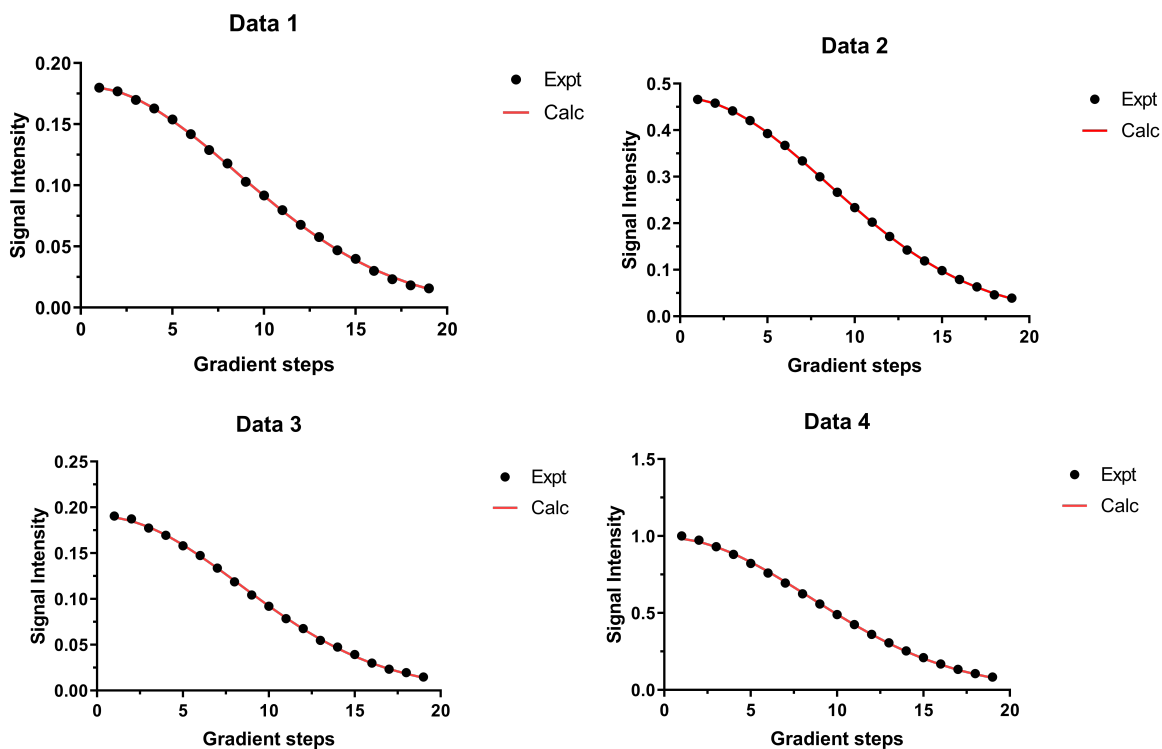

**Figure S22.** Selected fitted plots of signal attenuation for assembly  $\text{CB}[8]^{\text{Pt.12}}$ . Black dots: experimental values; red line: fitted curve.

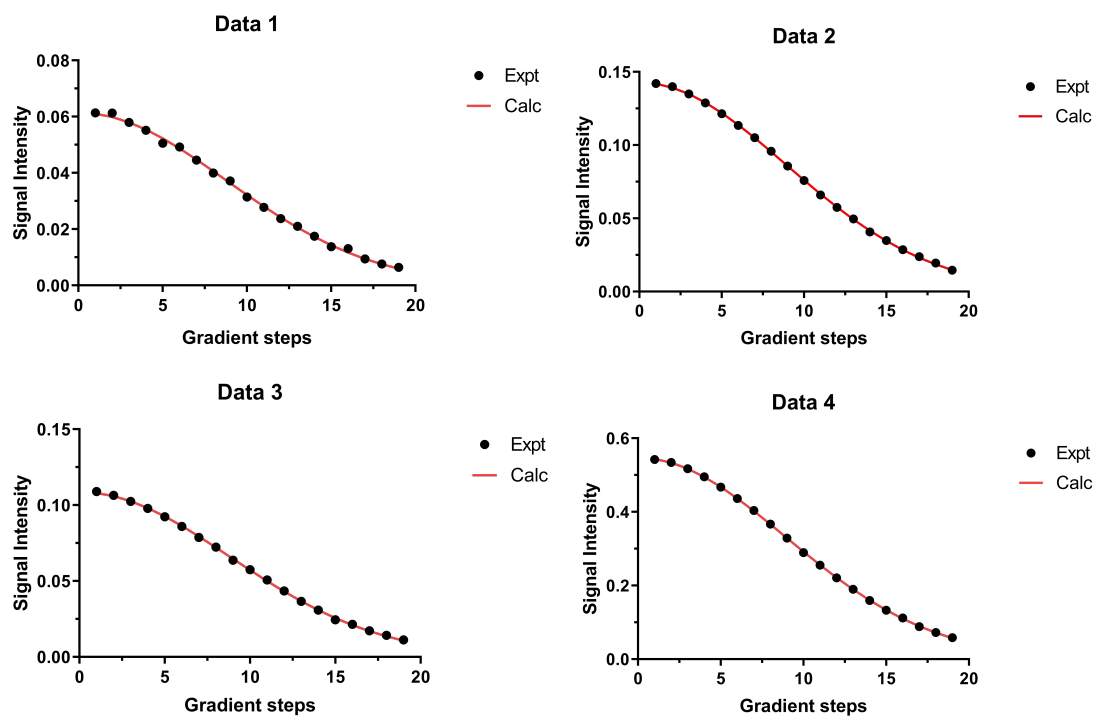

**Figure S23.** Selected fitted plots of signal attenuation for assembly  $\text{CB}[8]^{\text{Pt.12-CB}[8]^{\text{PhcHT}}}$ . Black dots: experimental values; red line: fitted curve.

| Entry   | CB[8] <sup>Pt</sup> ·1 <sub>2</sub> | CB[8] <sup>Pt</sup> ·1 <sub>2</sub> ·CB[8] <sup>Phe</sup> <sub>HT</sub> |
|---------|-------------------------------------|-------------------------------------------------------------------------|
| 1       | $1.612 \times 10^{-10}$             | $1.489 \times 10^{-10}$                                                 |
| 2       | $1.619 \times 10^{-10}$             | $1.507 \times 10^{-10}$                                                 |
| 3       | $1.643 \times 10^{-10}$             | $1.524 \times 10^{-10}$                                                 |
| 4       | $1.663 \times 10^{-10}$             | $1.520 \times 10^{-10}$                                                 |
| 5       | $1.657 \times 10^{-10}$             | $1.479 \times 10^{-10}$                                                 |
| 6       | $1.704 \times 10^{-10}$             | $1.516 \times 10^{-10}$                                                 |
| 7       | $1.660 \times 10^{-10}$             | $1.509 \times 10^{-10}$                                                 |
| 8       | $1.663 \times 10^{-10}$             | $1.515 \times 10^{-10}$                                                 |
| 9       | $1.674 \times 10^{-10}$             | $1.492 \times 10^{-10}$                                                 |
| 10      | $1.650 \times 10^{-10}$             | $1.474 \times 10^{-10}$                                                 |
| 11      | $1.531 \times 10^{-10}$             | $1.478 \times 10^{-10}$                                                 |
| 12      | $1.522 \times 10^{-10}$             | $1.464 \times 10^{-10}$                                                 |
| 13      | $1.516 \times 10^{-10}$             | $1.481 \times 10^{-10}$                                                 |
| 14      | $1.492 \times 10^{-10}$             | $1.544 \times 10^{-10}$                                                 |
| 15      | $1.505 \times 10^{-10}$             | $1.472 \times 10^{-10}$                                                 |
| 16      | $1.435 \times 10^{-10}$             | $1.500 \times 10^{-10}$                                                 |
| 17      | $1.501 \times 10^{-10}$             | $1.492 \times 10^{-10}$                                                 |
| 18      | $1.460 \times 10^{-10}$             | $1.508 \times 10^{-10}$                                                 |
| 19      |                                     | $1.594 \times 10^{-10}$                                                 |
| 20      |                                     | $1.568 \times 10^{-10}$                                                 |
| Average | $1.584 (\pm 0.035) \times 10^{-10}$ | $1.506 (\pm 0.013) \times 10^{-10}$                                     |

**Table S1.** List of diffusion constants for individual proton signals in assemblies CB[8]<sup>Pt</sup>·1<sub>2</sub> and CB[8]<sup>Pt</sup>·1<sub>2</sub>·CB[8]<sup>Phe</sup><sub>HT</sub> obtained by fitting each signal attenuation upon gradient field application.

## 6. Mass spectrometry analysis of Pt/peptide/CB[n] assemblies

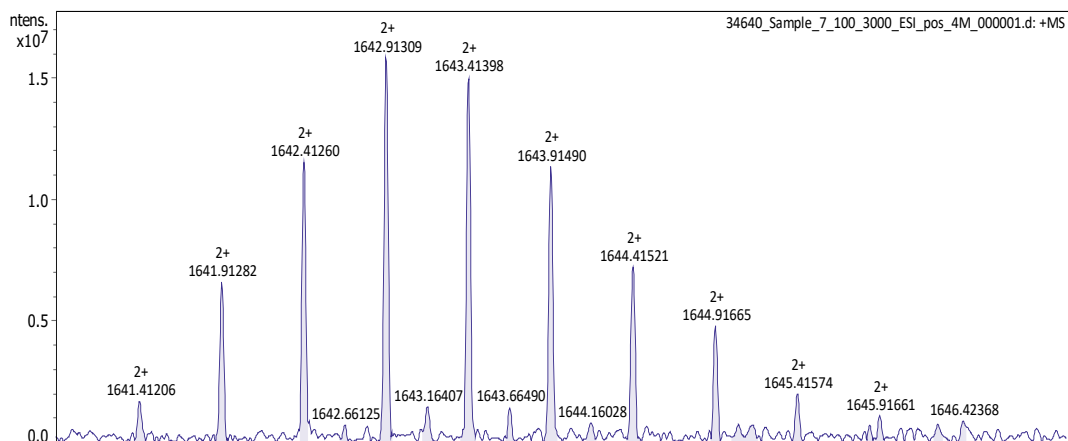

**Figure S24.** MS spectrum (ESI) of assembly  $\text{CB}[8]^{\text{Pt}} \cdot 12$  corresponding to  $[\text{M}]^{2+}$ .

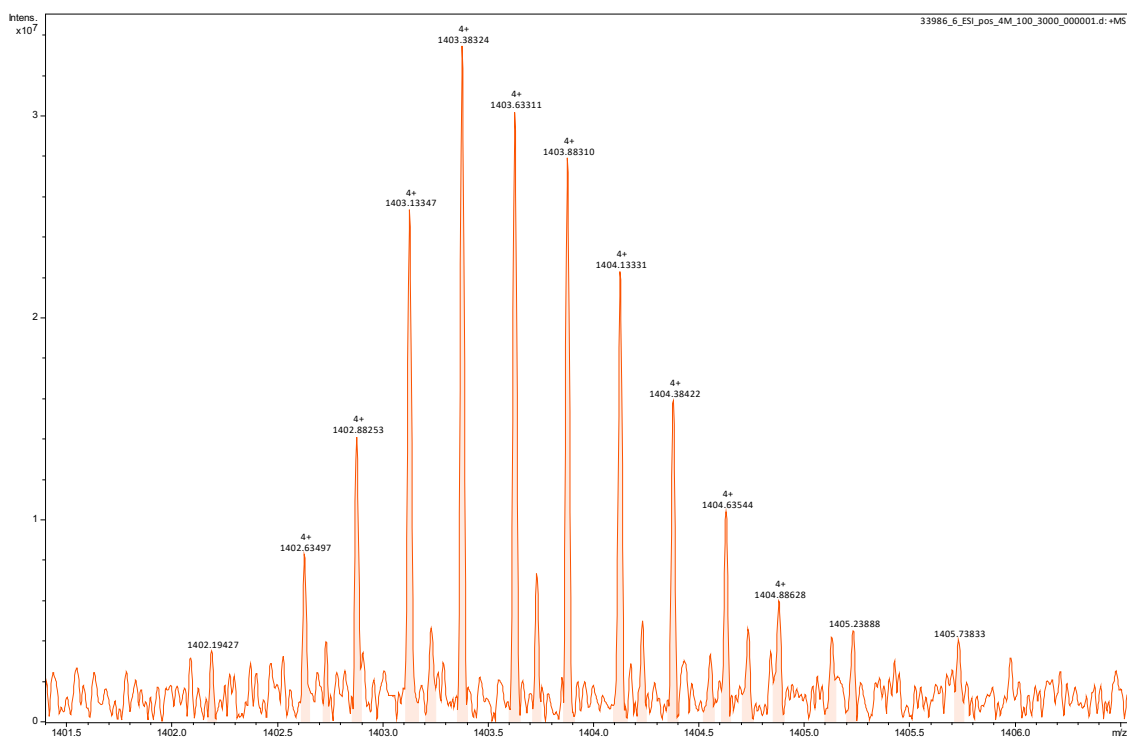

**Figure S25.** MS spectrum (ESI) of assembly  $\text{CB}[8]^{\text{Pt}} \cdot (1\text{-CB}[7]^{\text{Phe}})_2$  corresponding to  $[\text{M}+2\text{H}]^{4+}$ .

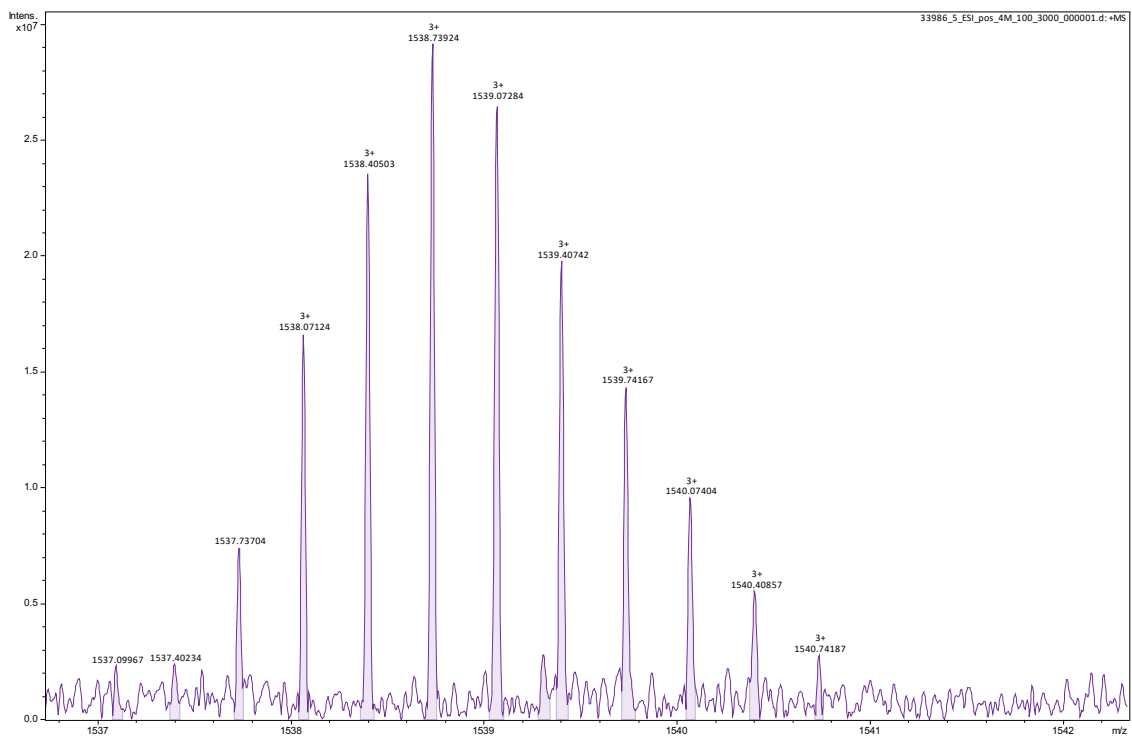

**Figure S26.** MS spectrum (ESI) of assembly  $\text{CB}[8]^{\text{Pt}} \cdot 12 \cdot \text{CB}[8]^{\text{Phe}}_{\text{HT}}$  corresponding to  $[\text{M}+\text{H}]^{3+}$ .

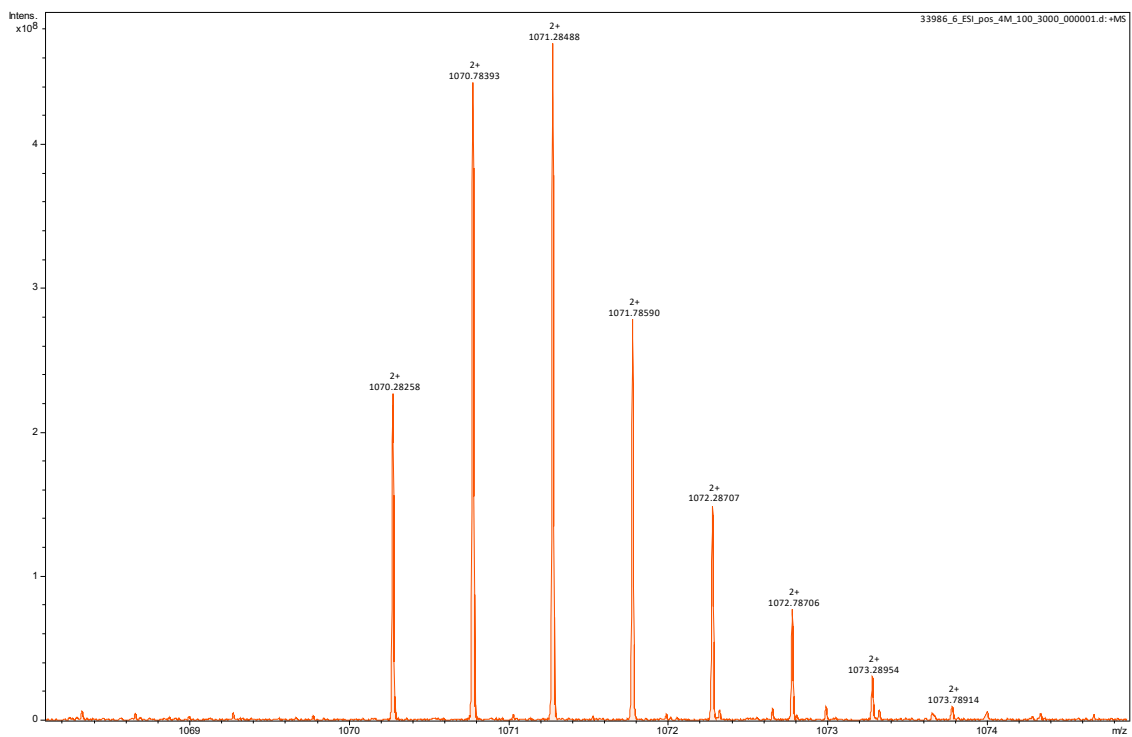

**Figure S27.** MS spectrum (ESI) of  $1 \cdot \text{CB}[7]^{\text{Phe}}$  assembly corresponding to  $[\text{M}+\text{H}]^{2+}$ .

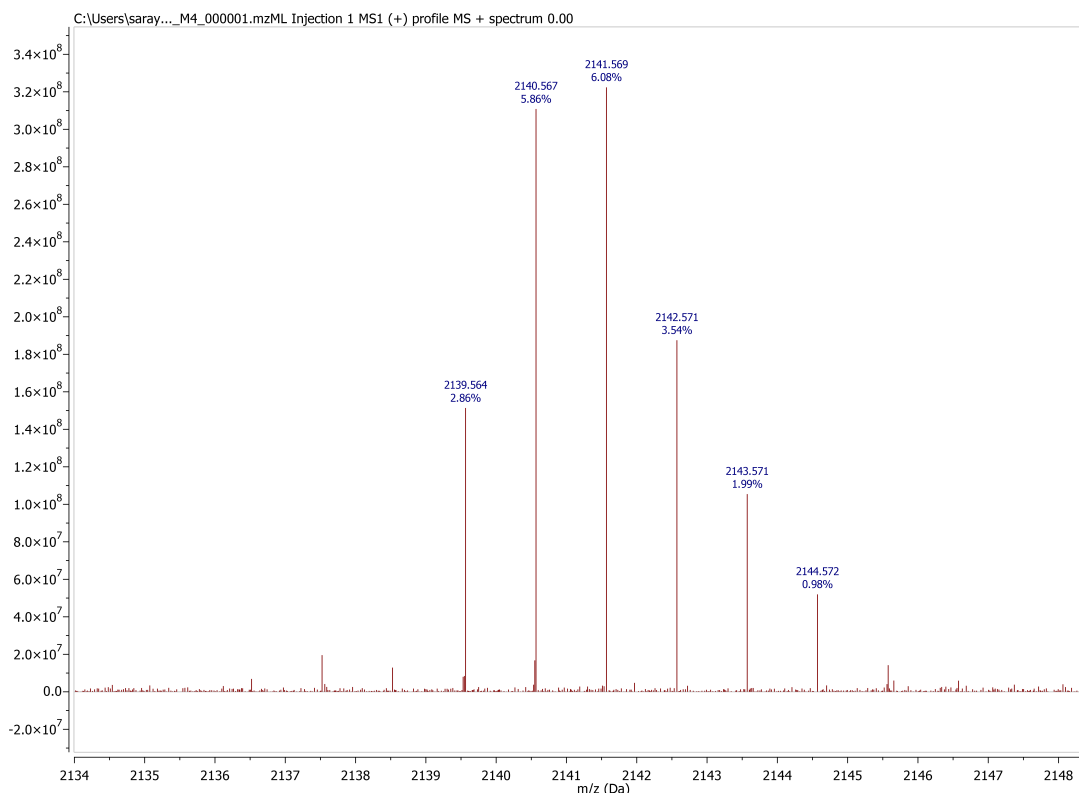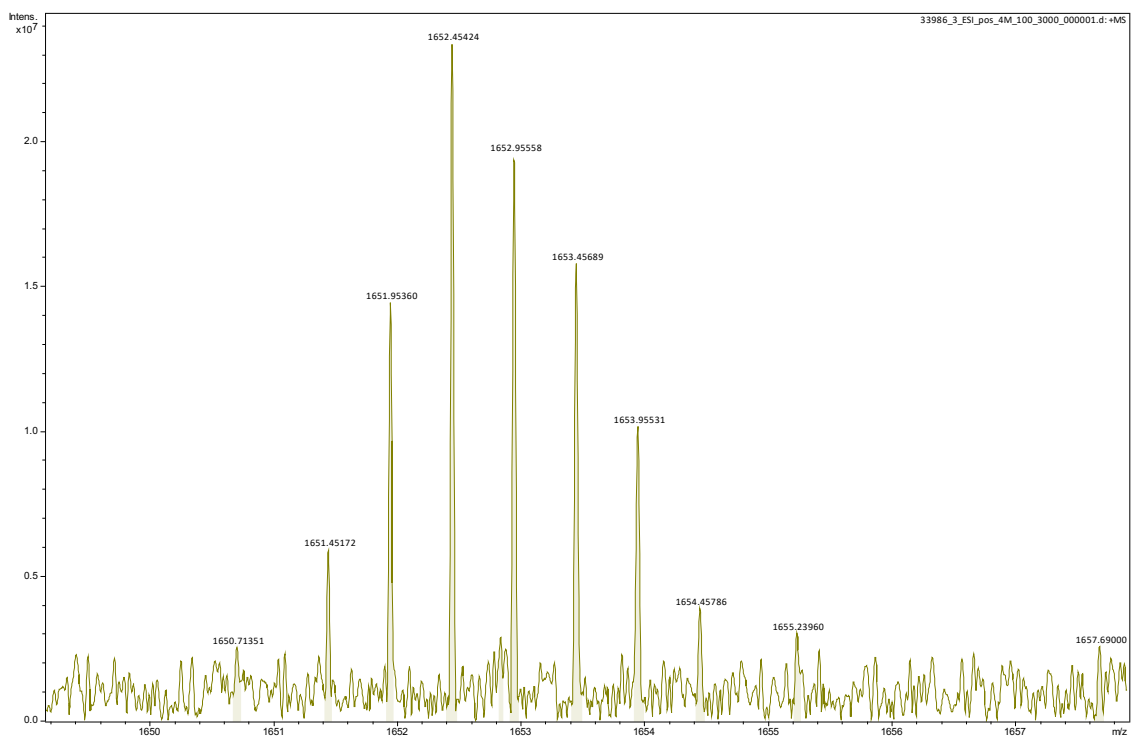

## 7. UV-Vis absorption spectra of the Pt/peptide/CB[n] assemblies

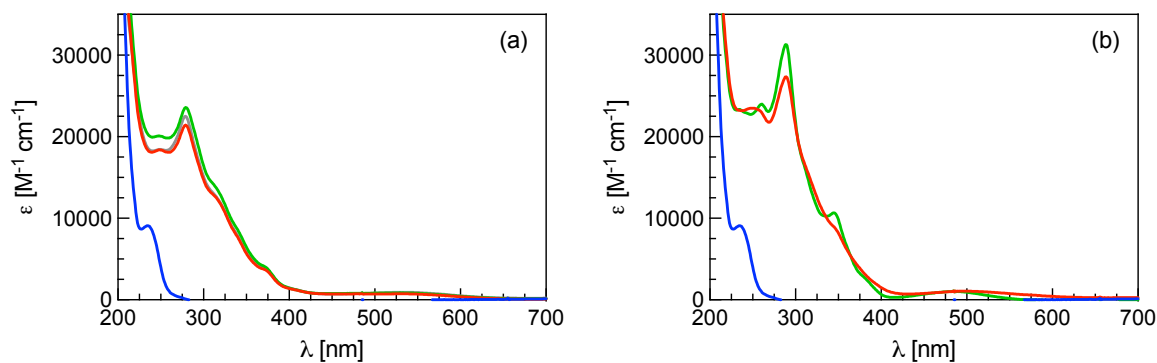

**Figure S30.** UV-Vis absorption spectra of (a) peptide FGGGC (in blue), and assemblies CB[8]<sup>Pt</sup>·1<sub>2</sub> (in red), CB[8]<sup>Pt</sup>·(1-CB[7]<sup>Phe</sup>)<sub>2</sub> (in green), and CB[8]<sup>Pt</sup>·1<sub>2</sub>·CB[8]<sup>Phe</sup><sub>HT</sub> (in grey); (b) peptide FGGGC (in blue), (b) 1-CB[7]<sup>Phe</sup> assemblies (in red), and (c) complex CB[7]<sup>Pt</sup>·1·CB[7]<sup>Phe</sup> (in green). All spectra recorded in H<sub>2</sub>O; Pt concentration 50  $\mu$ M.

## 8. Titration of peptide FGGGC with CB[8]

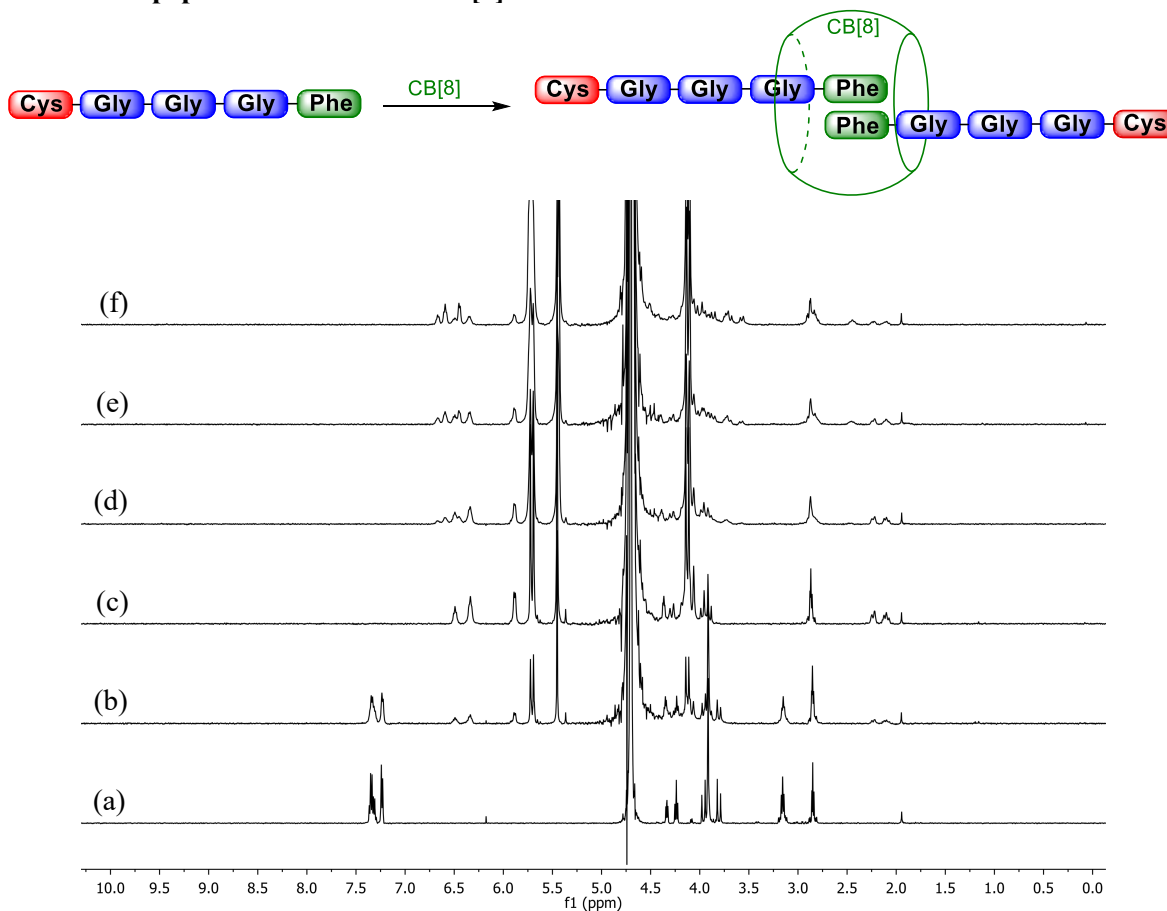

**Figure S31.** <sup>1</sup>H-NMR spectra of peptide FGGGC (1.0 mM) (a) in the absence of CB[8], and in the presence of (b) 0.25, (c) 0.50, (d) 0.75, (e) 1.0 and (f) 1.5 equiv CB[8] in D<sub>2</sub>O.

## 9. Isothermal Titration Calorimetry (ITC) experiments

All ITC experiments were carried out in MilliQ water at 25 °C on a Malvern MicroCal ITC200 instrument. The host (CB[7] or CB[8]) was located in the sample cell at concentrations ranging 30 – 100  $\mu\text{M}$  and the titrant (Pt complex or peptide) was in the injection syringe at concentrations ranging from 0.3 to 1.5 mM (approximately 10 times higher). The titrations consisted of 20 injections with an injection spacing of 150 s. Raw data was analyzed (baseline correction, integration and fitting) with the Affinimeter software.

**Table S2.** Thermodynamic data obtained by ITC titrations of the species involved in this study.

| System                                          | $K_1^a$                     | $\Delta G_1^b$     | $\Delta H_1^b$      | $T\Delta S_1^b$    | $K_2^a$                     | $\Delta G_2^b$              | $\Delta H_2^b$              | $T\Delta S_2^b$              | $\beta^c$                      | $\Delta G_\beta^b$ | $\alpha^d$ |
|-------------------------------------------------|-----------------------------|--------------------|---------------------|--------------------|-----------------------------|-----------------------------|-----------------------------|------------------------------|--------------------------------|--------------------|------------|
| FGGGC<br>vs CB[7]                               | $1.2 (\pm 0.2) \times 10^7$ | $-9.66 (\pm 0.09)$ | $-13.80 (\pm 0.02)$ | $-4.15 (\pm 0.09)$ |                             |                             |                             |                              |                                |                    |            |
| CB[8] <sup>Pt</sup> ·1 <sub>2</sub><br>vs CB[7] | $6.3 (\pm 0.2) \times 10^6$ | $-9.28 (\pm 0.02)$ | $-13.89 (\pm 0.02)$ | $-4.61 (\pm 0.03)$ |                             |                             |                             |                              |                                |                    |            |
| 2<br>vs CB[7]                                   | $1.8 (\pm 0.1) \times 10^5$ | $-7.18 (\pm 0.01)$ | $-8.47 (\pm 0.02)$  | $-1.28 (\pm 0.03)$ |                             |                             |                             |                              |                                |                    |            |
| FGGGC<br>vs CB[8]                               | $1.9 (\pm 0.6) \times 10^7$ | $-9.9 (\pm 0.2)$   | $-11.4 (\pm 0.1)$   | $-1.5 (\pm 0.2)$   | $1.2 (\pm 0.6) \times 10^6$ | $-8.3 (\pm 0.3)$            | $-10.4 (\pm 0.1)$           | $-2.0 (\pm 0.3)$             | $2.4 \times 10^{13}$           | $-18.2$            | $0.26$     |
| CB[8] <sup>Pt</sup> ·1 <sub>2</sub><br>vs CB[8] | $2.4 (\pm 0.3) \times 10^6$ | $-8.7 (\pm 0.1)$   | $-12.1 (\pm 0.1)$   | $-3.4 (\pm 0.1)$   | $1.7 (\pm 0.4) \times 10^6$ | $-8.5 (\pm 0.1)$            | $-8.6 (\pm 1.9)$            | $-0.1 (\pm 1.9)$             | $4.0 \times 10^{12}$           | $-17.2$            | $2.79$     |
|                                                 |                             |                    |                     |                    | $K_{\text{Pt-Pt}}^f$        | $\Delta G_{\text{Pt-Pt}}^b$ | $\Delta H_{\text{Pt-Pt}}^b$ | $T\Delta S_{\text{Pt-Pt}}^b$ |                                |                    |            |
| 2<br>vs CB[8] <sup>e</sup>                      |                             |                    |                     |                    | $2.0 (\pm 1.1) \times 10^4$ | $-5.9 (\pm 0.3)$            | $-6.7 (\pm 0.9)$            | $-0.9 (\pm 1.0)$             | $1.3 (\pm 0.6) \times 10^{13}$ | $-17.9 (\pm 0.3)$  |            |

<sup>a</sup> in  $\text{M}^{-1}$ . <sup>b</sup> in kcal/mol. <sup>c</sup>  $\beta = K_1 K_2 [\text{M}^{-2}]$ . <sup>d</sup> Interaction parameter  $\alpha = 4K_2/K_1$ . <sup>e</sup> Binding constant corresponding to the equilibrium  $2 + 2 + \text{CB}[8] \rightleftharpoons \text{CB}[8] \cdot 2_2$ , in  $\text{M}^{-2}$ . <sup>f</sup> Dimerization constant of complex 2 [ $\text{M}^{-1}$ ].

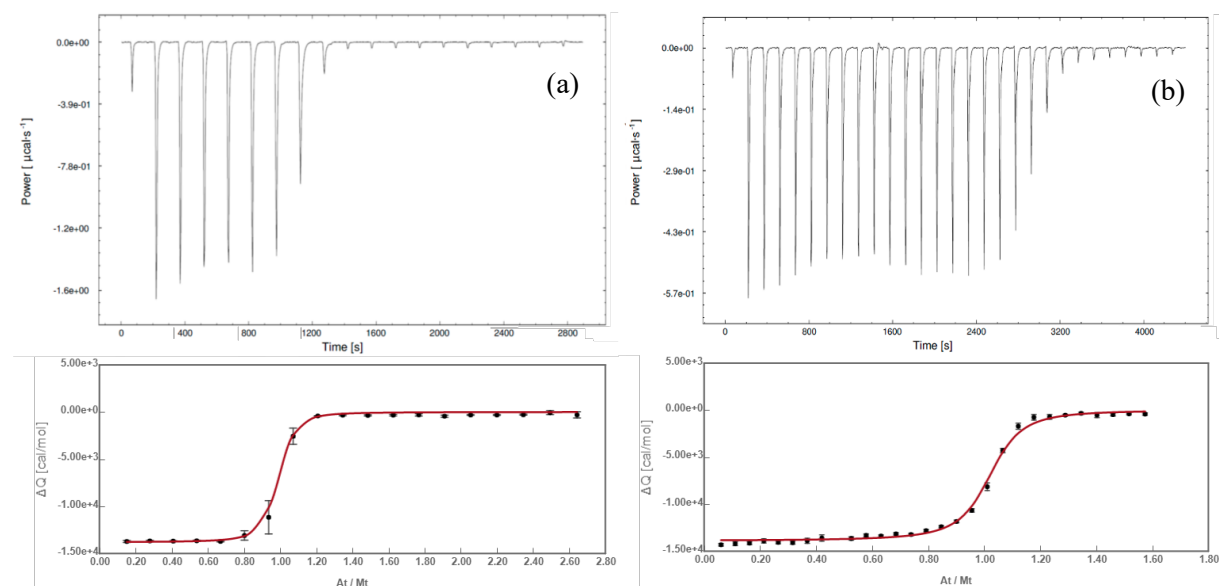

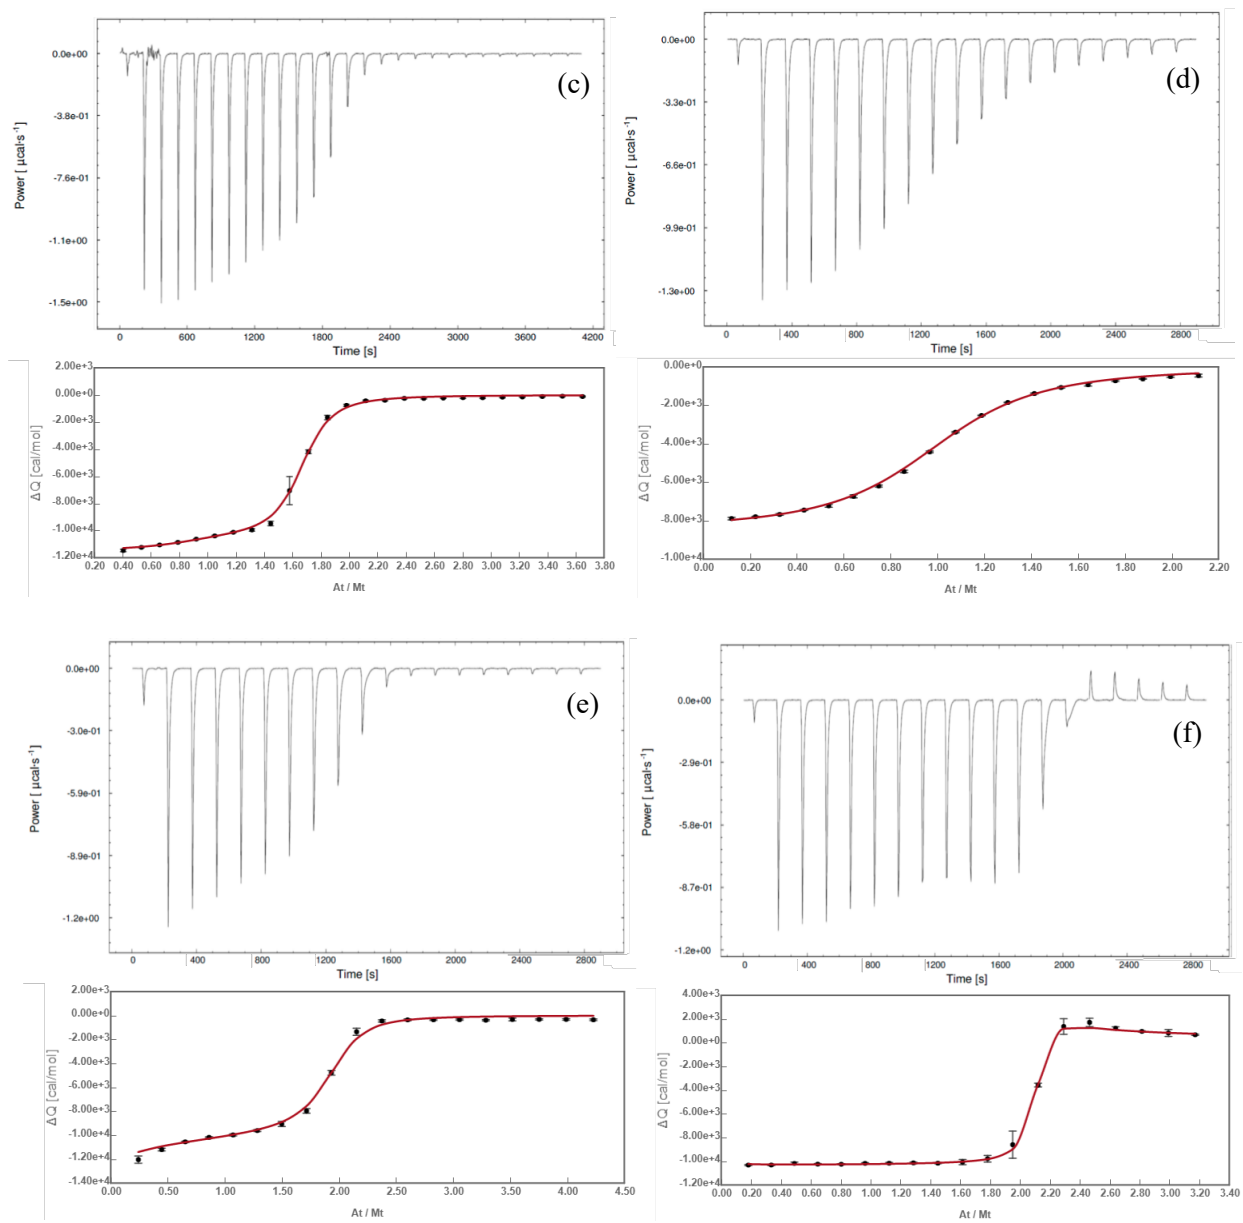

**Figure S32.** Representative enthalpograms for the titration of CB[7] (50  $\mu\text{M}$ ) with (a) FGGGC, (b) CB[8]<sup>Pt.12</sup>, and (c) **2** (0.50 mM) in MilliQ water at 25 °C. Representative enthalpograms for the titration of CB[8] (30  $\mu\text{M}$ ) with (d) FGGGC, (e) CB[8]<sup>Pt.12</sup>, and (f) **2** (0.30 mM) in MilliQ water at 25 °C.



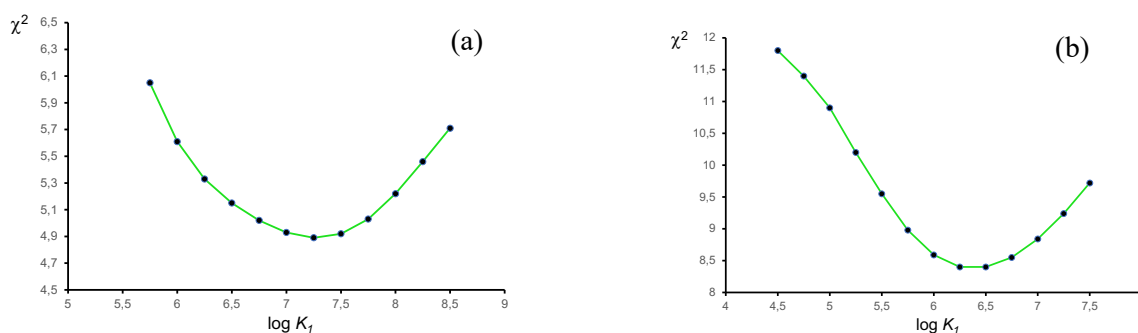

**Figure S33.** Goodness-of-fit value  $\chi^2$  as a function of binding constant  $K_1$  as fixed variable while binding affinity  $K_2$  is fitted, for the enthalpograms obtained upon titration of CB[8] with (a) FGGC, and (b) CB[8]<sup>Pt</sup>·1<sub>2</sub> (see Figure S32, enthalpograms d and e).

## 10. Computational details

Conformational screening for assembly CB[8]<sup>Pt</sup>·1<sub>2</sub>·CB[8]<sup>Phc</sup><sub>HT</sub> was carried out in Grimme's Conformer-Rotamer Ensemble Sampling Tool (CREST)<sup>8,9</sup> with the iMTD-GC algorithm and the generic GFN Force Field (GFN-FF)<sup>10</sup> with a surrogate structure that binds both peptides through a naphtho[1,2-b:8,7-b']dithiophene fragment (Figure S34). The distance between sulfur atoms was therefore controlled. The surrogate facilitated the computational load by removing Pt atoms and one CB[8] macrocycle. 11746 structures were generated, and the 37 best candidates were isolated for further evaluation (lowest energy within 25 kcal/mol of the most stable geometry). The surrogate fragment was then replaced by the CB[8]-secured platinum dimer in the 37 candidates, which were reoptimized with the semiempirical tight-binding method GFN2-xTB.<sup>11,12</sup> All GFN-FF and GFN2-xTB calculations were performed in conjunction with the GBSA solvation model.<sup>13,14</sup> The four structures with the lowest energy (within 10 kcal/mol of the most stable geometry) were finally reoptimized by density functional theory with the TURBOMOLE<sup>15-18</sup> suite of programs (version 7.2.1) at the B97-3c/def2-mTZVP level of theory with COSMO<sup>19,20</sup> solvation parameters. The m4 grid size was used and convergence criteria were 10<sup>-5</sup> hartree. Enthalpic and entropic contributions at 25 °C ( $\Delta G_{T,xTB}$ ) were obtained by vibrational analysis using GFN2-xTB-optimized structures. Free energies of solvation ( $\Delta G_{\text{solv},xTB}$ ) were also calculated using the GBSA solvation model on GFN2-xTB-optimized structures. The relative stability ( $\Delta G$ ) of the four assemblies was calculated using equation (2), where  $\Delta E_{\text{B97-3c}}$  is the electronic contribution at 0 K calculated by DFT in the gas phase.

$$\Delta G = \Delta E_{\text{B97-3c}} + \Delta G_{T,xTB} + \Delta G_{\text{solv},xTB} \quad (2)$$

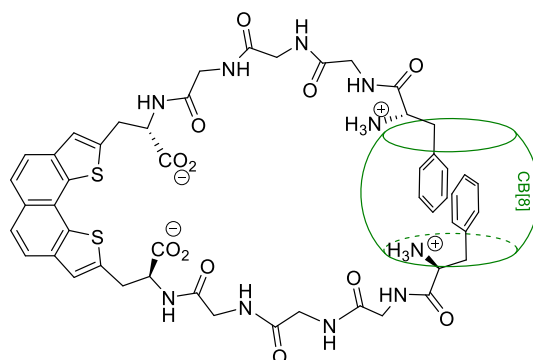

**Figure S34.** Surrogate used for initial conformational screening with the GFN-FF force field.

# 11. Coordinates of the most stable structure of pendant necklace CB[8]<sup>Pt</sup>·1<sub>2</sub>·CB[8]<sup>Ph</sup><sub>HT</sub>

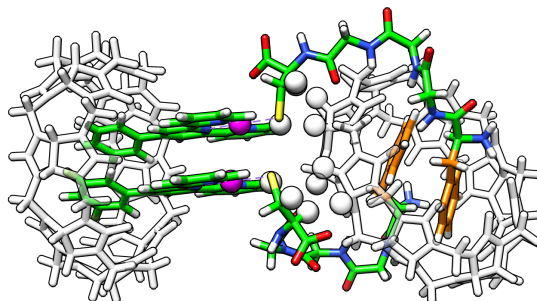

|   |             |            |            |   |            |            |            |   |            |            |            |
|---|-------------|------------|------------|---|------------|------------|------------|---|------------|------------|------------|
| S | -0.4346860  | 8.1843884  | 2.9254170  | C | -1.9935104 | 15.8872744 | 0.1428082  | C | -2.5262868 | 23.0791649 | -0.9670471 |
| C | 1.0095628   | 8.6362825  | 3.9782137  | C | -1.8491329 | 16.0743786 | -1.2282388 | N | -3.0369445 | 22.5197213 | 0.2746842  |
| C | -5.5448212  | 8.2227380  | 1.9958932  | C | -2.9600635 | 16.4595444 | -1.9718114 | C | -4.2421739 | 21.8860146 | 0.0814449  |
| C | 1.8923349   | 9.7095928  | 3.3569365  | C | -4.1777292 | 16.7013535 | -1.3558791 | H | -3.8533287 | 23.2094886 | -0.7390293 |
| C | -6.4368726  | 8.7557780  | 0.8563795  | H | -3.3300790 | 15.8641374 | 1.8021171  | H | -2.5336567 | 24.1667575 | -0.9312322 |
| N | 2.6770384   | 9.2507243  | 2.2313585  | H | -1.1453614 | 15.5724097 | 0.7363679  | N | -2.6215702 | 21.5071849 | -2.7003984 |
| H | 1.2501362   | 10.4898751 | 2.9708638  | H | -2.8789660 | 16.5374853 | -2.0450777 | N | -1.2302448 | 22.5861425 | -1.3448358 |
| C | -6.9506935  | 7.6180395  | -0.0474223 | H | -5.0243453 | 17.0100898 | -1.9496094 | C | -1.3084117 | 22.626252  | -2.3160789 |
| N | -7.5617092  | 9.5166373  | 1.3731556  | S | -3.7384708 | 8.4008188  | 1.7200888  | O | -4.9556321 | 21.4023168 | 0.9615197  |
| H | -5.8299250  | 9.4233226  | 0.2502369  | H | 1.8522499  | 18.3354051 | 2.4826389  | O | -0.3601870 | 20.9837667 | -2.7708858 |
| C | -7.4069305  | 10.7257682 | 1.9160157  | H | -0.0051071 | 17.7017163 | 3.9581662  | C | -2.7091252 | 23.1360593 | 1.5406941  |
| H | -8.4723388  | 9.1074242  | 1.2118074  | N | -4.2491711 | 19.9742121 | 3.3234439  | H | -2.7831051 | 24.2199659 | 1.4275913  |
| C | 2.5073602   | 9.7734869  | 1.0051574  | H | -4.1968010 | 18.1904532 | 2.2223471  | H | -3.4431409 | 22.8188124 | 2.2719913  |
| H | 3.5783640   | 8.8666812  | 2.4760698  | H | -2.5411606 | 17.0625518 | 3.8083736  | C | -0.0035795 | 23.2205739 | -0.9308522 |
| C | -8.6687129  | 11.4499723 | 2.3550782  | H | -2.4079158 | 18.5651257 | 4.6490729  | H | -0.1380539 | 24.2985711 | -1.0329935 |
| O | -6.2960548  | 11.2480659 | 2.0728335  | H | -4.5525875 | 20.3982510 | 2.4335398  | H | 0.7866740  | 22.8977141 | -1.5988904 |
| O | 1.5368752   | 10.4569212 | 0.6805699  | H | -3.4150791 | 20.5052792 | 3.6238255  | C | 3.1889856  | 22.3976461 | 2.6375701  |
| C | 3.6016882   | 9.4423091  | -0.0111519 | H | -5.0016000 | 20.1305571 | 4.0053922  | H | 3.9122526  | 22.2949613 | 1.8360374  |
| O | -8.1699658  | 7.3029202  | 0.0620290  | N | -6.8273968 | 14.3090979 | -2.0690120 | H | 3.4375733  | 23.2751270 | 3.2325087  |
| O | -6.0944682  | 7.0932637  | -0.7972429 | C | -6.5301038 | 13.9880518 | -3.4496369 | C | -5.8258296 | 21.6054384 | 1.8062541  |
| C | 2.8075748   | 10.3130849 | 4.4496973  | C | -6.7350861 | 15.3485121 | -4.1654930 | H | -6.1093777 | 22.4349346 | -2.4552171 |
| O | 3.9576137   | 9.8204763  | 4.5746650  | N | -7.3562435 | 16.1625260 | -3.1590703 | H | -6.5339615 | 21.5373492 | -0.9883000 |
| O | 2.2935321   | 11.2367728 | 5.1358275  | C | -7.3852766 | 15.5552144 | -1.9242954 | C | -2.9819904 | 20.9847725 | -4.0026119 |
| N | 3.6057390   | 10.3970987 | -1.0904047 | H | -7.1906542 | 13.1998785 | -3.8088808 | H | -2.0870757 | 20.5945579 | -4.4653625 |
| H | 4.5750175   | 9.4138639  | 0.4730296  | H | -7.3670602 | 15.2829563 | -5.0502054 | H | -3.3504830 | 21.8220837 | -4.6120517 |
| H | 3.4183442   | 8.4542084  | -0.4280174 | N | -5.1587937 | 13.6621029 | -3.7371124 | C | 2.2986628  | 18.0749388 | 6.8373167  |
| H | -9.0161452  | 11.0051503 | 3.2909833  | N | -5.3808961 | 15.7183067 | -4.5381502 | H | 3.2835077  | 18.0125505 | 7.2948351  |
| N | -9.4694206  | 11.3218864 | 1.6296423  | C | -4.4975557 | 14.6275274 | -4.3873494 | H | 1.5519436  | 18.1791634 | 7.6170017  |
| H | -8.3684363  | 12.8539303 | 2.5252020  | O | -7.8509154 | 16.0251340 | -0.8977453 | C | 4.3226528  | 17.8423911 | 4.0188744  |
| C | -9.3075795  | 13.8063040 | 2.5280734  | C | -3.3441845 | 14.6401300 | -4.7881247 | H | 4.8371680  | 17.7637709 | 3.0669478  |
| H | -7.3867136  | 13.1038361 | 2.5100415  | N | -0.7013063 | 13.7535496 | 4.1218532  | H | 5.0414304  | 17.7030739 | 4.8266033  |
| C | -8.8294773  | 15.2573890 | 2.5723157  | C | -0.0291021 | 12.7975738 | 3.2753031  | C | 0.5745570  | 22.2346307 | 4.9837714  |
| O | -10.5189498 | 13.5684718 | 2.4432393  | C | -1.1585801 | 12.2091111 | 2.4062817  | H | 1.0868864  | 23.1348317 | 5.3252299  |
| C | 3.8643843   | 11.7028111 | -0.8576403 | N | -2.3163625 | 12.9696947 | 2.8200077  | H | -0.2773865 | 22.0452401 | 5.6274484  |
| C | 3.0754704   | 10.1612654 | -0.9116632 | C | -2.0387696 | 13.8488490 | 3.8301211  | N | -3.9766850 | 19.9606745 | -3.9771322 |
| C | 4.3351628   | 12.1120908 | 0.2007494  | H | 0.5048073  | 17.0770950 | 3.8943445  | C | -5.3915853 | 20.2467752 | -3.8862491 |
| C | 3.5702887   | 12.6238710 | -0.0387597 | H | -1.3221365 | 11.1397174 | 2.5532249  | C | -6.0581918 | 18.9495865 | -4.4014736 |
| H | -8.7591462  | 15.6043595 | 1.5425754  | N | 0.8604228  | 13.3909719 | 2.3038162  | N | -4.9304501 | 18.0896644 | -4.6897519 |
| H | -9.6121573  | 15.8269460 | 3.0630244  | N | -0.7375670 | 12.4783658 | 1.0556587  | C | -3.7310140 | 18.7041935 | -4.0188744 |
| N | -7.5636679  | 15.5180791 | 3.2155275  | O | 0.4523206  | 13.1667632 | 1.0142373  | H | -5.6380463 | 21.1276531 | -4.4778463 |
| H | -6.7348227  | 15.5062411 | 2.6414246  | O | -2.8510699 | 14.5928900 | -4.3941556 | H | -6.6597003 | 19.0205663 | -5.2979830 |
| C | -7.4332999  | 15.5904433 | 4.5476260  | O | 1.0302890  | 13.5230954 | -0.0046119 | N | -5.8944560 | 20.3737230 | -2.5409128 |
| C | -8.3745889  | 15.4489208 | 5.3333923  | C | 2.0244164  | 16.8439268 | 6.1146108  | N | -6.8845406 | 18.5348082 | -3.2970481 |
| O | -6.0282438  | 15.8210946 | 5.0938230  | C | 2.9852503  | 16.1402336 | 5.3389746  | C | -6.8305657 | 19.4080165 | -2.2603558 |
| N | 3.3673959   | 13.9870106 | -1.6337337 | C | 2.2133430  | 14.8787716 | 4.8806755  | O | -2.6162044 | 18.2291784 | -4.6879052 |
| H | 2.6921233   | 12.2717244 | -2.5781585 | N | 0.8603001  | 15.1393691 | 5.3322873  | O | -7.5056013 | 19.3596763 | -1.2216969 |
| H | 4.4132540   | 12.5891169 | -2.7253758 | C | 0.7898860  | 16.2433949 | 6.1508592  | C | -7.8682641 | 17.4841836 | -3.3915791 |
| H | 2.5675341   | 14.1569459 | -1.0377031 | H | 3.8804312  | 15.9957548 | 5.1988505  | H | -8.6295830 | 17.6832729 | -6.4539282 |
| C | 4.2751233   | 14.9535621 | -1.8204078 | N | 2.5889650  | 13.9495247 | 5.3075651  | H | -8.3212062 | 17.5134276 | -4.3807653 |
| O | 5.3606753   | 14.7898187 | -2.3874497 | N | 3.3452082  | 16.7979831 | 4.0886972  | C | -5.0721844 | 16.8353280 | -5.3879643 |
| C | 3.9244961   | 16.3337884 | -1.2750722 | N | 2.3832749  | 14.8802186 | 3.4487056  | H | -4.1325412 | 16.6199475 | -5.8850018 |
| C | -5.5987231  | 14.8493359 | 5.3266951  | C | 3.0487879  | 15.9912182 | 3.0007062  | H | -5.8533860 | 16.9504411 | -6.1392038 |
| N | -5.0942338  | 16.5108551 | 4.2236739  | O | -0.1900316 | 16.6026473 | 6.7863225  | C | -2.6169606 | 12.2389587 | -1.9311026 |
| H | -6.1424070  | 16.3617864 | 6.0289854  | O | 3.3467892  | 16.2286413 | 1.8361624  | N | -3.9760975 | 12.2435537 | -2.1644934 |
| C | -5.1192696  | 17.8462761 | 4.1125066  | N | 1.4583408  | 21.1090144 | 5.0921528  | C | -4.7454109 | 11.9544010 | -0.9819828 |
| H | -4.2795856  | 15.9787566 | 3.9450148  | C | 2.8870154  | 21.1935557 | 4.8545983  | C | -3.6711510 | 11.7689080 | 0.1113844  |
| O | -5.9932852  | 18.5492534 | 4.6250747  | C | 3.3930871  | 19.8115965 | 5.3348273  | N | -2.4357447 | 11.9942252 | -0.5921869 |
| C | -4.0225970  | 18.4997551 | 3.2509720  | N | 2.2549771  | 19.2541358 | 6.0124984  | H | -5.3662490 | 11.0715620 | -1.1469077 |
| H | 4.3818229   | 17.0603448 | -1.9396003 | N | 1.1228069  | 20.0178940 | 5.8614944  | H | -3.6835015 | 10.7771303 | 0.5726096  |
| H | 4.3819046   | 16.4347202 | -0.2960471 | H | 3.3158161  | 22.0315976 | 5.40029753 | N | -4.0002622 | 12.7679361 | 1.1022466  |
| N | 2.5129952   | 16.6254497 | -1.1270728 | H | 4.2475023  | 19.8671065 | 6.0080399  | N | -5.5546549 | 13.0287775 | -0.4683134 |
| H | 2.1388339   | 16.6357486 | -0.1893313 | N | 3.2889684  | 21.2357952 | 3.4751506  | C | -5.1977799 | 13.4258558 | 0.7815193  |
| C | 1.7605292   | 16.969194  | -2.1803248 | N | 3.7654405  | 19.1628915 | 4.0939305  | O | -5.7525363 | 14.2184685 | 1.5024821  |
| O | 0.2780055   | 17.2284985 | -1.9090690 | C | 3.7750810  | 20.0307352 | 3.0279261  | O | -1.7365665 | 12.3633531 | -2.7674208 |
| C | 2.1906323   | 17.0359413 | -3.3350753 | O | 0.0277233  | 19.7918192 | 6.3511303  | C | -4.5550787 | 12.3847869 | -3.3474699 |
| C | -2.6075228  | 18.1396990 | 3.6641298  | O | 4.1694730  | 19.7845440 | 1.8982551  | H | -5.3126430 | 11.6148696 | -3.6139829 |
| O | -0.1417879  | 17.7611392 | -0.9724836 | C | -0.1468331 | 14.1148639 | 5.4005898  | H | -3.7577890 | 12.2374496 | -4.1952646 |
| C | -0.5078942  | 15.9105674 | -1.8755716 | O | 0.2761401  | 13.2169698 | 5.8551470  | C | -6.8507360 | 13.3429504 | -1.0099125 |
| N | -0.1954811  | 18.1153793 | -3.0169352 | H | -0.9471372 | 14.4913684 | 6.0277044  | H | -7.4583330 | 13.7559623 | -0.2119220 |
| H | 0.0774700   | 15.1812986 | -1.3216131 | C | 2.2266779  | 13.7032077 | 2.6374206  | H | -7.3089844 | 12.4200585 | -1.3680054 |
| H | -0.6010794  | 15.5266410 | -2.8907615 | H | 2.7725773  | 13.8460524 | 1.7121393  | H | -1.1607667 | 11.6445230 | -0.0355929 |
| H | 0.4220453   | 17.9380328 | -3.8168339 | H | 2.6532679  | 12.8593488 | 3.1785853  | H | -1.1863671 | 10.6172528 | 0.3314684  |
| H | -0.1402989  | 19.1245293 | -2.8072386 | N | -1.4025204 | 22.8109067 | 2.0363787  | H | -0.4224334 | 11.7191816 | -0.8248087 |
| C | -1.1573087  | 17.9410073 | -3.3297440 | C | -0.2197862 | 23.4998132 | 1.5641108  | C | -3.6504765 | 12.5598840 | 2.4845070  |
| H | -1.5207552  | 18.5582274 | 2.7099196  | C | 0.8106099  | 23.2714334 | 2.6926835  | H | -3.7645830 | 11.4996803 | 2.7153677  |
| H | -5.2736364  | 16.6432893 | 0.4745886  | O | 0.0805817  | 22.4766391 | 3.6521744  | H | -4.3406103 | 13.1265430 | 3.0965689  |
| C | -0.2049941  | 16.2355676 | 3.0394592  | C | -1.2115677 | 22.2518607 | 3.2761408  | H | 1.5954008  | 7.7507254  | 4.2115584  |
| O | 0.8437262   | 18.5974502 | 2.2147221  | H | -0.4448584 | 24.5513422 | 1.3870832  | H | 0.6046208  | 9.0264372  | 4.9098416  |
| C | 0.6054713   | 19.3104985 | 1.0477373  | H | 1.1609359  | 24.1913660 | 3.1594348  | H | -5.7489124 | 8.8018168  | 2.8913546  |
| C | -0.6984322  | 19.6267723 | 0.7059266  | N | 0.4082246  | 22.9104300 | 0.4088168  | H | -5.7762588 | 7.2189481  | 2.1890100  |
| C | -1.7521685  | 19.2425099 | 1.5227642  | N | 1.8976588  | 22.6000773 | 2.0272435  | H | -2.2323162 | 5.7412721  | -4.2601502 |
| H | 1.4338978   | 19.628     |            |   |            |            |            |   |            |            |            |

|    |            |            |            |   |            |            |            |    |            |            |            |
|----|------------|------------|------------|---|------------|------------|------------|----|------------|------------|------------|
| N  | -2.9752223 | 7.1627304  | -1.3028623 | N | -2.9814532 | -4.4374747 | 1.0291828  | O  | -0.1916194 | 4.4349470  | -5.2726481 |
| H  | -2.6776691 | 8.0594631  | -5.0289876 | C | -3.3870316 | -4.7231104 | -0.2551851 | O  | 1.4764633  | -0.5534350 | -8.3515103 |
| H  | -3.3181269 | 9.7802972  | -3.3501342 | H | -5.9022439 | -3.3211246 | 0.8439686  | C  | 3.5129066  | 1.4874891  | -8.1537182 |
| H  | -3.5167080 | 9.0924639  | -0.9443757 | H | -4.3061745 | -3.9292687 | 2.5641010  | H  | 3.6973804  | 0.5004431  | -8.5634892 |
| C  | -2.3988909 | 4.8645570  | -1.6625762 | N | -4.6777796 | -1.6835268 | 0.4165839  | C  | 3.9024528  | 2.2393293  | -8.8411854 |
| C  | -2.1767609 | 2.4920827  | -0.2718628 | N | -3.2336585 | -2.2240849 | 2.0136231  | C  | 2.5395809  | 4.3167489  | -6.2025426 |
| C  | -2.0539124 | 3.7172380  | -2.3466445 | C | -3.7460788 | -1.1798975 | 1.2896552  | H  | 2.1675574  | 5.0129039  | -5.4588464 |
| N  | -2.5940998 | 4.8029781  | -0.3352601 | O | -2.9061291 | -5.5740554 | -0.9893985 | H  | 3.0014658  | 4.8780470  | -7.0166078 |
| C  | -2.5021813 | 3.6677182  | 0.3780892  | O | -3.4480089 | 0.0023433  | 1.4170213  | C  | 5.3576025  | 1.8501203  | -0.6695581 |
| C  | -1.9442136 | 2.5086710  | -1.6523930 | C | 2.7664207  | -4.6958404 | 2.0335877  | N  | 5.7865837  | 1.8668542  | -1.9808212 |
| H  | -1.9217763 | 3.7503476  | -3.4137460 | H | 3.1854068  | -5.0665372 | 2.9707250  | C  | 6.7817684  | 0.8439921  | -2.2371152 |
| H  | -2.1130802 | 1.5725220  | 0.2853315  | H | 2.8172498  | -5.4809133 | 1.2869483  | C  | 6.7034746  | -0.0379212 | -0.9724857 |
| C  | -2.7564182 | 3.8727825  | 1.8055223  | C | 2.3443422  | -1.7177411 | 3.9332320  | N  | 5.8849585  | 0.7288193  | -0.0764428 |
| C  | -3.2007512 | 4.4859155  | 4.4457934  | H | 2.1285529  | -0.7283625 | 4.3212973  | H  | 7.7600318  | 1.2937111  | -2.3930067 |
| C  | -2.6501115 | 2.8803812  | 2.7623342  | H | 2.7371780  | -2.3386433 | 4.7386596  | H  | 7.6749651  | -0.2416307 | -0.5213511 |
| N  | -3.0828605 | 5.1571391  | 2.1711221  | N | -4.7926251 | -1.9304471 | -4.5821686 | N  | 6.1092259  | -1.2665917 | -1.4657031 |
| C  | -3.2881659 | 5.4500878  | 3.4580787  | C | -5.8470514 | -1.1510950 | -3.9617071 | N  | 6.4777538  | -0.0681457 | -3.3042381 |
| C  | -2.8802729 | 3.1863923  | 4.0949538  | C | -5.9810933 | -1.7964645 | -2.5657959 | C  | 6.1105898  | -1.3106078 | -2.8460492 |
| H  | -2.4029586 | 1.8725653  | 2.4674841  | N | -5.1955068 | -2.9942898 | -2.6713848 | O  | 5.8631330  | -2.2898914 | -3.5343411 |
| H  | -3.5042860 | 6.4855730  | 3.6701647  | C | -4.5170669 | -3.0755081 | -3.8630086 | O  | 4.6607333  | 2.6945133  | -0.1275773 |
| H  | -2.8018127 | 2.4173117  | 4.8486898  | H | -6.7589082 | -1.2058079 | -4.5570509 | C  | 5.7195598  | 3.0692626  | -2.7679577 |
| H  | -3.3800036 | 4.7645573  | 5.4726783  | H | -7.0082753 | -2.0385738 | -2.2919598 | H  | 6.7315563  | 3.4127085  | -2.9913056 |
| C  | -1.5915121 | 1.2813450  | -2.3721219 | N | -5.5176456 | 0.2168111  | -3.6731886 | H  | 5.2109433  | 3.8197458  | -2.1719531 |
| C  | -0.8972123 | -1.0637834 | -3.7459805 | N | -5.4538586 | -0.7275417 | -1.6849354 | C  | 6.7198973  | 0.2277953  | -4.6921382 |
| C  | -0.8200884 | 1.3498832  | -3.5338885 | C | -5.3078128 | 0.4374180  | -2.3324266 | H  | 6.7920661  | -0.7146803 | -5.2237995 |
| C  | -2.0089242 | 0.0387248  | -1.8947041 | O | -3.8230473 | -4.0100530 | -4.2359035 | H  | 7.6713507  | 0.7547818  | -4.7677861 |
| C  | -1.6510269 | -1.0965343 | -2.5884963 | O | -5.0644838 | 1.5128007  | -1.8067505 | C  | 5.8228513  | 0.4873433  | 1.3377331  |
| C  | -0.4874148 | 0.1809475  | -4.1833759 | N | -2.2451968 | 0.2939595  | -7.6839600 | H  | 6.8259712  | 0.2460357  | 1.6913218  |
| H  | -0.4514379 | 2.2876277  | -3.9189081 | C | -3.2846417 | 1.2780964  | -7.5268054 | H  | 5.4842827  | 1.3989181  | 1.8179276  |
| H  | -2.6167651 | -0.0499142 | -1.0097983 | C | -4.3586740 | 5.4474868  | -6.6875432 | C  | 6.1279658  | -2.4769979 | -0.6826319 |
| F  | -2.0390674 | -2.2967028 | -2.1114458 | C | -3.7594616 | -0.7392999 | -6.4193119 | H  | 7.1014342  | -2.5741021 | -0.1956247 |
| F  | 0.2974549  | 0.2504899  | -5.2767824 | N | -2.5586399 | -0.9007747 | -7.0779973 | H  | 5.9894480  | -3.3083068 | -1.2652430 |
| H  | -0.6304898 | -1.9640619 | -4.2758304 | H | -3.6432640 | 1.6081322  | -8.5020711 | H  | 1.0887300  | 5.2673188  | -2.9268968 |
| Pt | -3.1118674 | 6.4565349  | 6.6050240  | H | -5.3069297 | 0.4205306  | -7.2105026 | C  | 0.8131378  | 6.0576194  | -2.2626968 |
| N  | 5.7025343  | 1.0124193  | -5.3433493 | N | -2.9432759 | 1.40170286 | -6.7082417 | C  | 0.1339595  | 8.0408975  | -0.4872071 |
| C  | 5.6166601  | 2.4461139  | -5.2203566 | N | -4.5325421 | 2.4034646  | -5.5401782 | C  | 0.6654648  | 5.7927687  | -0.8977510 |
| C  | 4.5977674  | 2.8426823  | -6.3180557 | C | -3.7477337 | 2.5281183  | -5.6003834 | C  | 0.6201918  | 7.3479370  | -2.7172286 |
| N  | 4.2312102  | 1.5803967  | -6.9088399 | O | -1.9065360 | -1.9325243 | -7.1392367 | C  | 0.2791974  | 8.3508868  | -1.8262274 |
| C  | 4.9271050  | 0.5231104  | -6.3684387 | C | -3.7804896 | 3.4769913  | -4.8278854 | N  | 0.3217386  | 6.8012535  | -0.0285131 |
| H  | 6.5990491  | 2.8998560  | -5.3505532 | C | -4.5480034 | -1.8682657 | -6.0002969 | H  | 0.7371405  | 7.5627542  | -3.7687543 |
| H  | 5.0071280  | 3.5137772  | -7.0730397 | H | -5.5042518 | -1.8426194 | -6.5288870 | H  | 0.1211173  | 9.3657162  | -2.1573561 |
| N  | 5.0017854  | 2.9270906  | -4.0052388 | H | -4.0137213 | -2.7701151 | -6.2786341 | H  | -0.1104135 | 8.7726502  | 0.2628332  |
| C  | 3.5468546  | 3.5025167  | -5.5794675 | C | -5.6431233 | 1.2782448  | -4.6339824 | C  | 0.8581102  | 4.4782948  | -0.2857013 |
| C  | 3.8109405  | 3.5671452  | -4.2364043 | H | -6.5550169 | 1.1169256  | -5.2100992 | C  | 1.1413599  | 2.1947636  | 1.2442472  |
| O  | 4.8943260  | -0.6348709 | -6.7585578 | H | -5.7243039 | 2.2127480  | -4.0895786 | C  | 1.1965562  | 3.2899984  | -0.9044837 |
| O  | 3.1192558  | 4.1234412  | -3.3909972 | C | -5.6277684 | -0.8391141 | -0.2580252 | N  | 0.6684401  | 4.4885316  | 1.0460223  |
| N  | 3.5806880  | -3.5966021 | 1.5775869  | H | -5.5133083 | 0.1678157  | 0.1298066  | C  | 0.8171536  | 3.4040859  | 1.8271262  |
| C  | 4.1897723  | -2.6609935 | 2.4892160  | H | -6.6335078 | -1.1989625 | -0.0316165 | C  | 1.3331484  | 2.1262924  | -0.1396171 |
| C  | 5.2687287  | -1.9610688 | 1.6305742  | C | -1.2164053 | 0.4121632  | -8.6860307 | H  | 1.3539925  | 3.2685394  | -1.9693292 |
| N  | 5.1002954  | -2.5549872 | 0.3239071  | H | -1.6556834 | 0.8668489  | -9.5755927 | H  | 1.2820808  | 1.3235394  | 1.8607768  |
| C  | 4.1676511  | -3.5709807 | 0.3329532  | H | -0.8717043 | -0.5866051 | -8.9308756 | C  | 0.5924361  | 3.6838069  | 3.2450426  |
| H  | 4.5942080  | -3.1861294 | 3.3548657  | C | -2.1444566 | 3.5080507  | -7.1939393 | C  | 0.1060823  | 4.4015156  | 5.8500067  |
| H  | 6.2847667  | -2.1244996 | 1.9908842  | H | -2.3377595 | 4.3613291  | -6.5533222 | C  | 0.7071784  | 2.7355807  | 4.2458631  |
| N  | 3.3464577  | -1.5702824 | 2.9150487  | H | -2.4477384 | 3.7520717  | -8.2125052 | N  | 0.2440682  | 4.9788400  | 3.5468303  |
| N  | 4.9234942  | -0.5647451 | 1.7268844  | C | -2.0753063 | -5.2866479 | 1.7608421  | C  | -0.0071124 | 5.3135299  | 4.8174726  |
| C  | 3.8320521  | -0.3455964 | 2.5298643  | H | -2.5682994 | -5.6219360 | 2.6742282  | C  | 0.4669654  | 3.0965812  | 5.5618920  |
| O  | 3.9282661  | -4.3336880 | -0.5919384 | H | -1.8588440 | -6.1467812 | 1.1367702  | H  | 0.9668632  | 1.7206634  | 3.9902785  |
| O  | 3.3893680  | 0.7436388  | 2.8708454  | C | -2.4352584 | -2.0278912 | 3.1912748  | H  | -0.3136363 | 6.3342656  | 4.9800313  |
| N  | -0.8224128 | -4.6775540 | 2.1165994  | C | -2.4354195 | -0.9671985 | 3.4178970  | H  | 0.5534805  | 2.3636890  | 6.3501860  |
| C  | -0.6563515 | -3.8218091 | 3.2591303  | H | -2.8949943 | -2.5713979 | 4.0185471  | H  | -0.0977280 | 4.7210148  | 6.8603139  |
| C  | 0.8789517  | -3.7180811 | 3.4169298  | C | -5.2654971 | -4.0770498 | -1.7263951 | C  | 1.6503012  | 0.8462391  | -0.7795572 |
| N  | 1.3757970  | -4.3825342 | 2.2312683  | H | -6.3064129 | -4.2026811 | -1.4273422 | C  | 2.1777428  | -1.5991283 | -2.0461399 |
| C  | 0.3745156  | -5.0122150 | 1.5283132  | H | -4.9281057 | -4.9776410 | -2.2275231 | C  | 2.3880655  | 0.8142823  | -1.9629835 |
| H  | -1.1580911 | -4.2436389 | 4.1298089  | N | -0.7287941 | 3.2567256  | -7.1939398 | C  | 1.1755067  | -0.3453343 | -0.2288025 |
| H  | 1.2619721  | -4.2022568 | 4.3149659  | C | -0.0408427 | 2.6211074  | -8.2892430 | C  | 1.4431882  | -1.5311821 | -0.8780336 |
| N  | -1.0630837 | -2.4441584 | 3.0634475  | C | 1.4466707  | 2.9461161  | -8.0176019 | C  | 2.6254665  | -0.4005042 | -2.5674151 |
| N  | 1.1122903  | -2.2992441 | 3.4767856  | N | 1.4125109  | 3.5879622  | -6.7195385 | H  | 2.7831862  | 1.7141711  | -2.4043792 |
| C  | -0.0246453 | -1.5643201 | 3.2579905  | C | 0.1302583  | 3.8171185  | -6.2829017 | H  | 0.5664419  | -0.3561275 | 0.6615716  |
| O  | 0.5225833  | -5.7685962 | 0.5793950  | H | -0.4083531 | 3.0079712  | -9.2394113 | F  | 0.9338849  | -2.6723415 | -0.3732917 |
| O  | -0.1055211 | -0.3412386 | 3.2622563  | H | 1.8910385  | 3.6131126  | -8.7563338 | F  | 3.3057371  | -0.4219906 | -3.7308701 |
| N  | -4.4598412 | -3.9142159 | -0.5451025 | N | -0.0656652 | 1.1760395  | -8.2866630 | H  | 2.3759087  | -2.5395700 | -2.5345253 |
| C  | -4.8675632 | -3.1076135 | 0.5761822  | N | 2.0884217  | 1.6594681  | -8.0490601 | Pt | 0.1695611  | 6.1896293  | 1.9067695  |
| C  | -3.8487003 | -3.4857183 | 1.6798682  | C | 1.1945802  | 0.6292942  | -8.2259006 |    |            |            |            |

## 12. References

- 1 F. Diederich, P. J. Stang and R. R. Tykwinski, in *Modern supramolecular chemistry*, Wiley-VCH Verlag GmbH & Co. KGaA, 2008.
- 2 W. L. F. Armarego and C. L. L. Chai, *Purification of Laboratory Chemicals*, Butterworth-Heinemann, 2012.
- 3 K. Kotturi and E. Masson, *Chem. - Eur. J.*, 2018, **24**, 8670–8678.
- 4 E. O. Stejskal and J. E. Tanner, *J. Chem. Phys.*, 1965, **42**, 288–292.
- 5 D. H. Wu, A. Chen and C. S. Johnson, *J. Magn. Reson. Ser. A*, 1995, **115**, 123–126.
- 6 C. S. Johnson, *Prog. Nucl. Magn. Reson. Spectrosc.*, 1999, **34**, 203–256.
- 7 P. W. Kuchel, G. Pagès, K. Nagashima, S. Velan, V. Vijayaragavan, V. Nagarajan and K. H. Chuang, *Concepts Magn. Reson. Part A*, 2012, 205–214.
- 8 S. Grimme, *J. Chem. Theory Comput.*, 2019, **15**, 2847–2862.
- 9 P. Pracht, F. Bohle and S. Grimme, *Phys. Chem. Chem. Phys.*, 2020, **22**, 7169–7192.
- 10 S. Spicher and S. Grimme, *Angew. Chem., Int. Ed.*, 2020, **59**, 15665–15673.
- 11 S. Grimme, C. Bannwarth and P. Shushkov, *J. Chem. Theory Comput.*, 2017, **13**, 1989–2009.
- 12 C. Bannwarth, S. Ehlert and S. Grimme, *J. Chem. Theory Comput.*, 2019, **15**, 1652–1671.
- 13 M. Brieg, J. Setzler, S. Albert and W. Wenzel, *Phys. Chem. Chem. Phys.*, 2017, **19**, 1677–1685.
- 14 A. V. Onufriev and D. A. Case, *Annu. Rev. Biophys.*, 2019, **48**, 275–296.
- 15 *TURBOMOLE V7.2.1 2015, a development of University of Karlsruhe and Forschungszentrum Karlsruhe GmbH, 1989-2007, TURBOMOLE GmbH, since 2007; available from <http://www.turbomole.com>*
- 16 R. Ahlrichs, M. Bär, M. Häser, H. Horn and C. Kölmel, *Chem. Phys. Lett.*, 1989, **162**, 165–169.
- 17 M. Sierka, A. Hogekamp and R. Ahlrichs, *J. Chem. Phys.*, 2003, **118**, 9136–9148.
- 18 P. Deglmann, K. May, F. Furche and R. Ahlrichs, *Chem. Phys. Lett.*, 2004, **384**, 103–107.
- 19 A. Klamt and G. Schüürmann, *J. Chem. Soc. Perkin Trans. 2*, 1993, 799–805.
- 20 A. Klamt, *J. Phys. Chem.*, 1995, **99**, 2224–2235.
